# Supplementary material
Source: PubMed Central journal article supplement (PMC8009080)

Female AKT

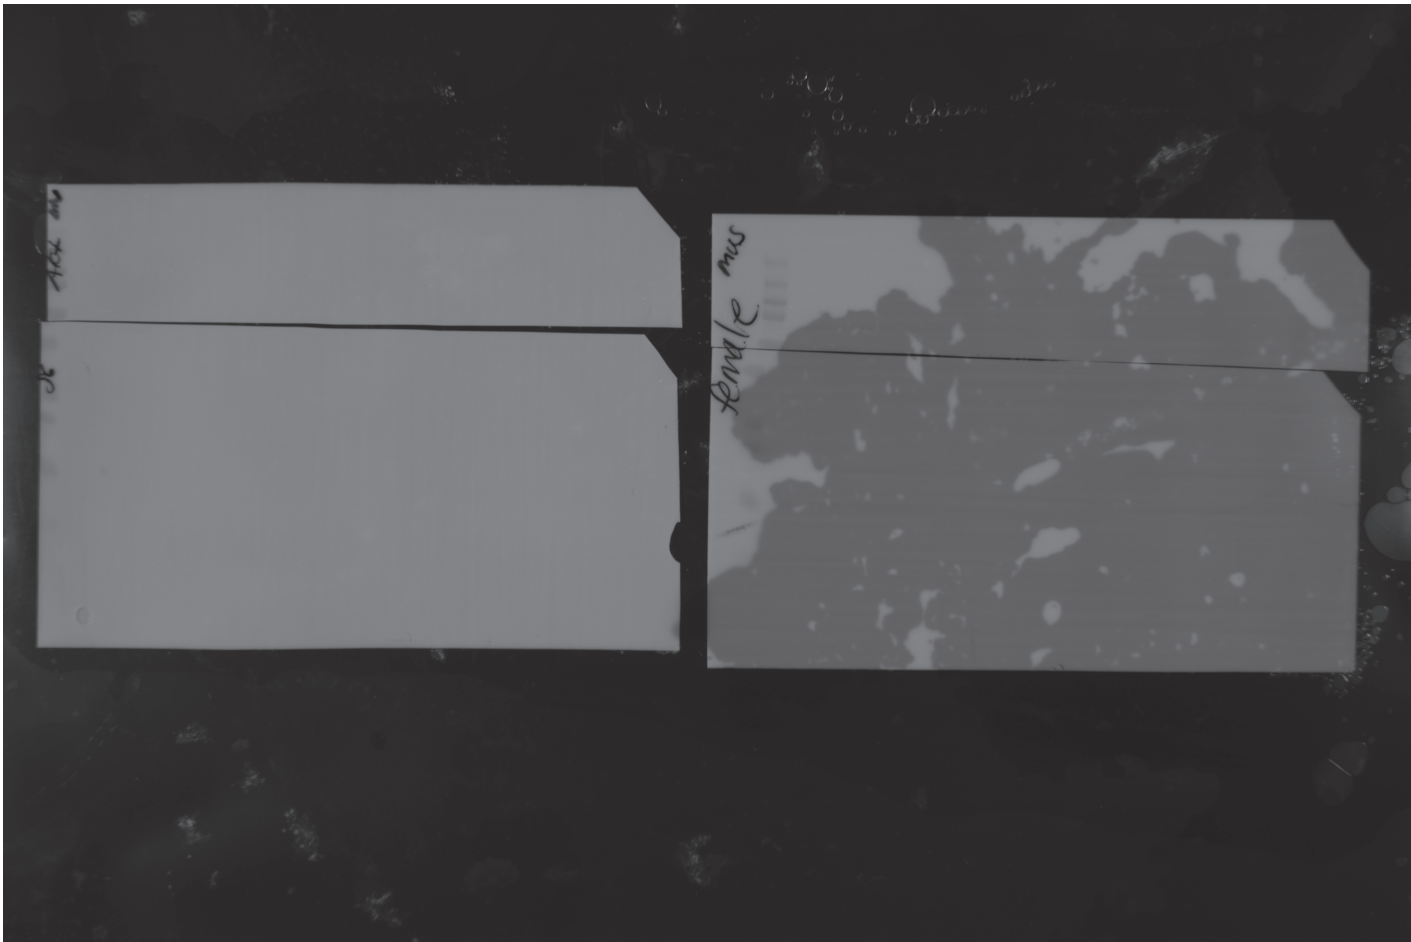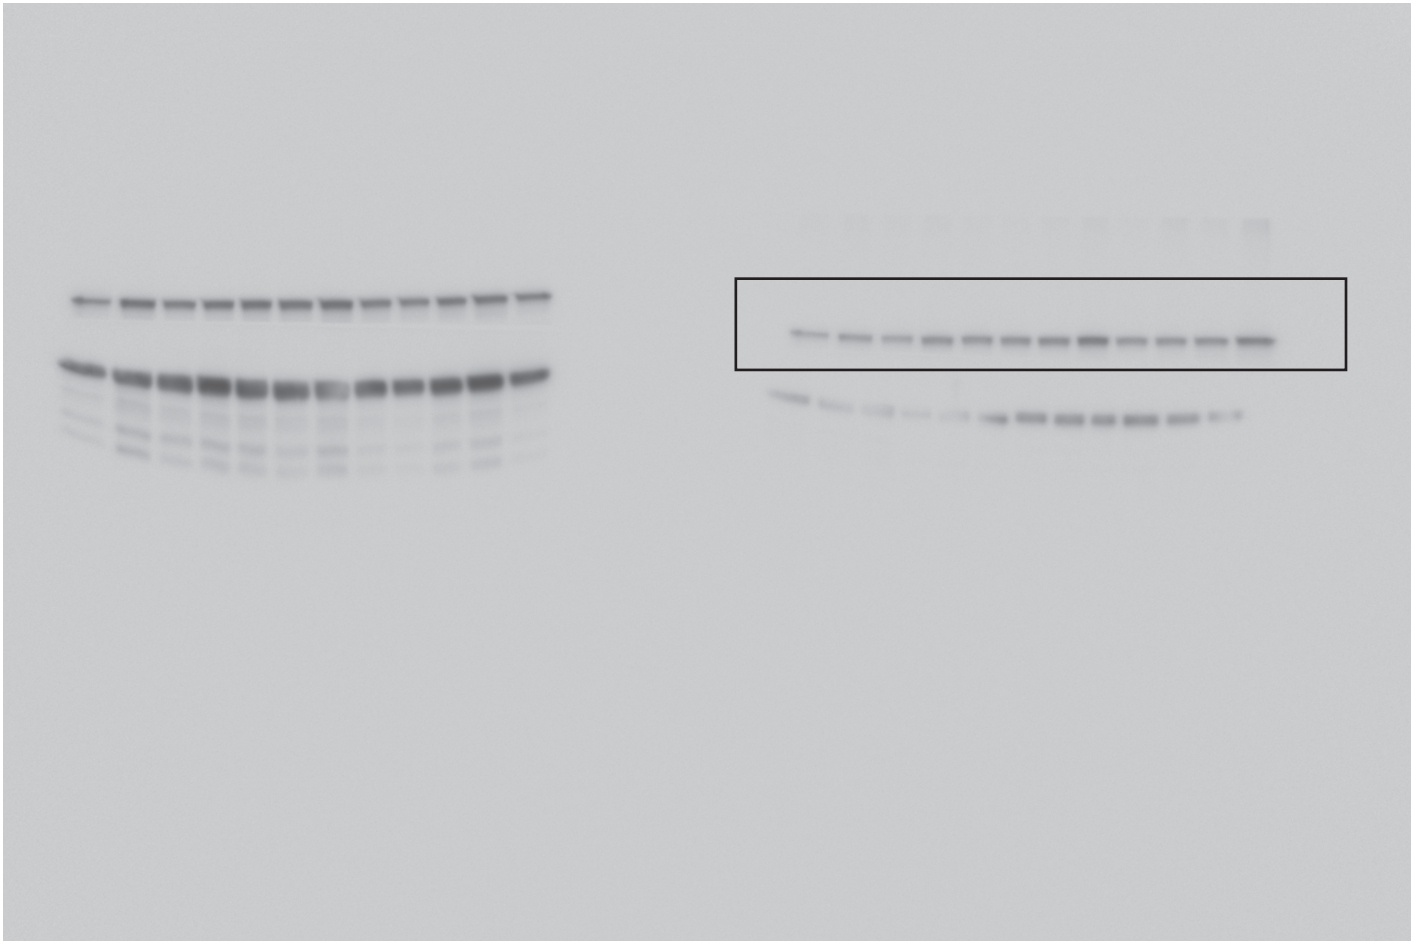

Female p-AKT

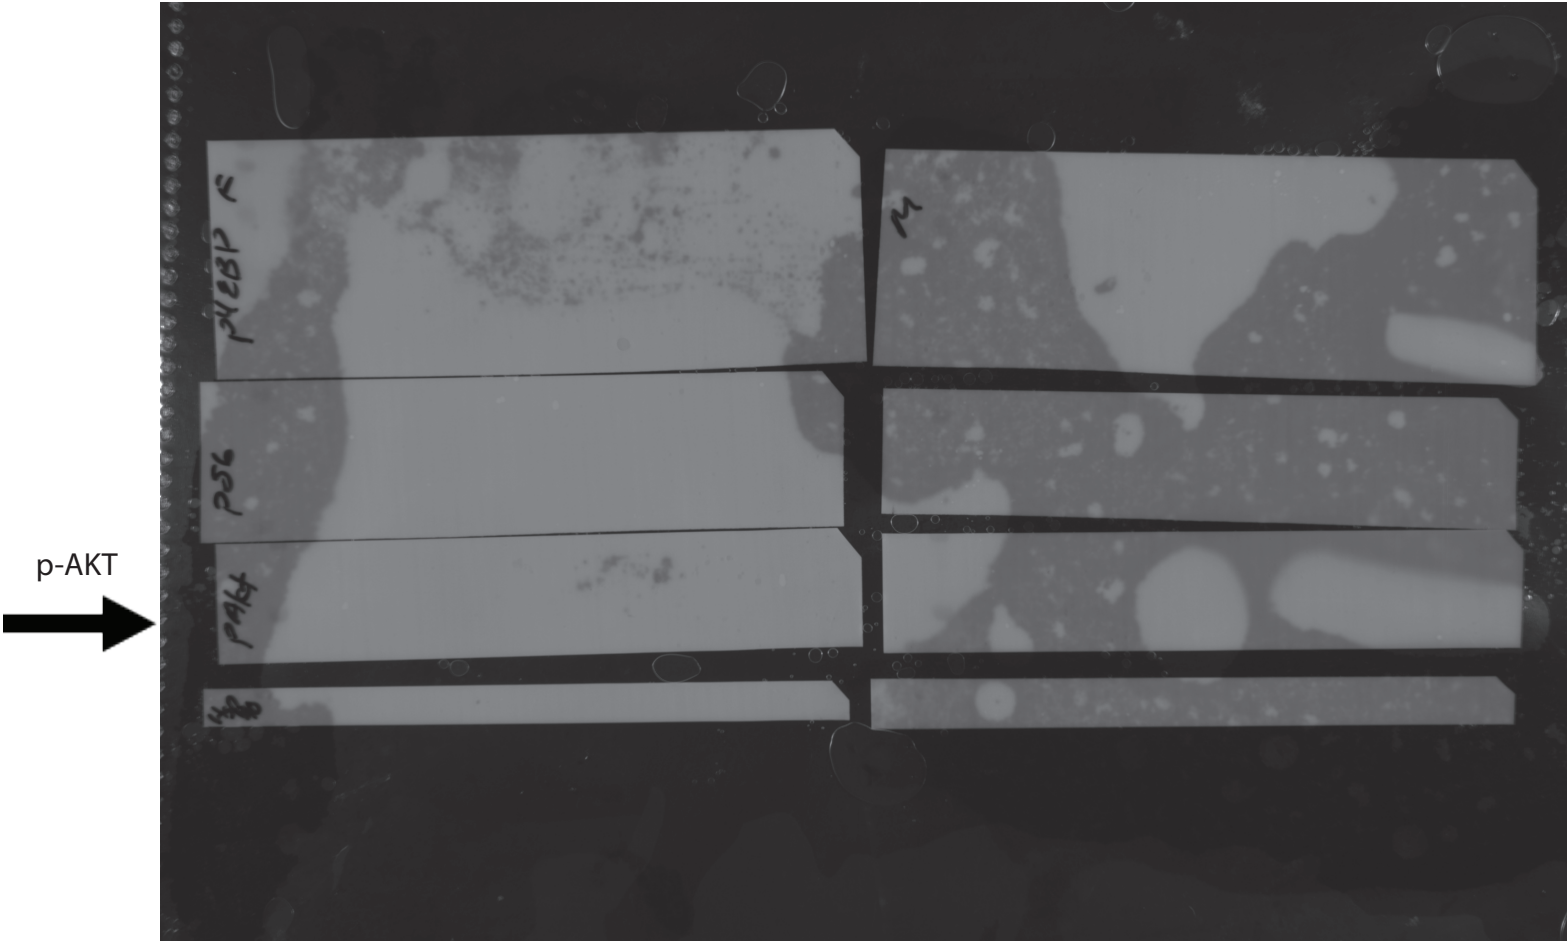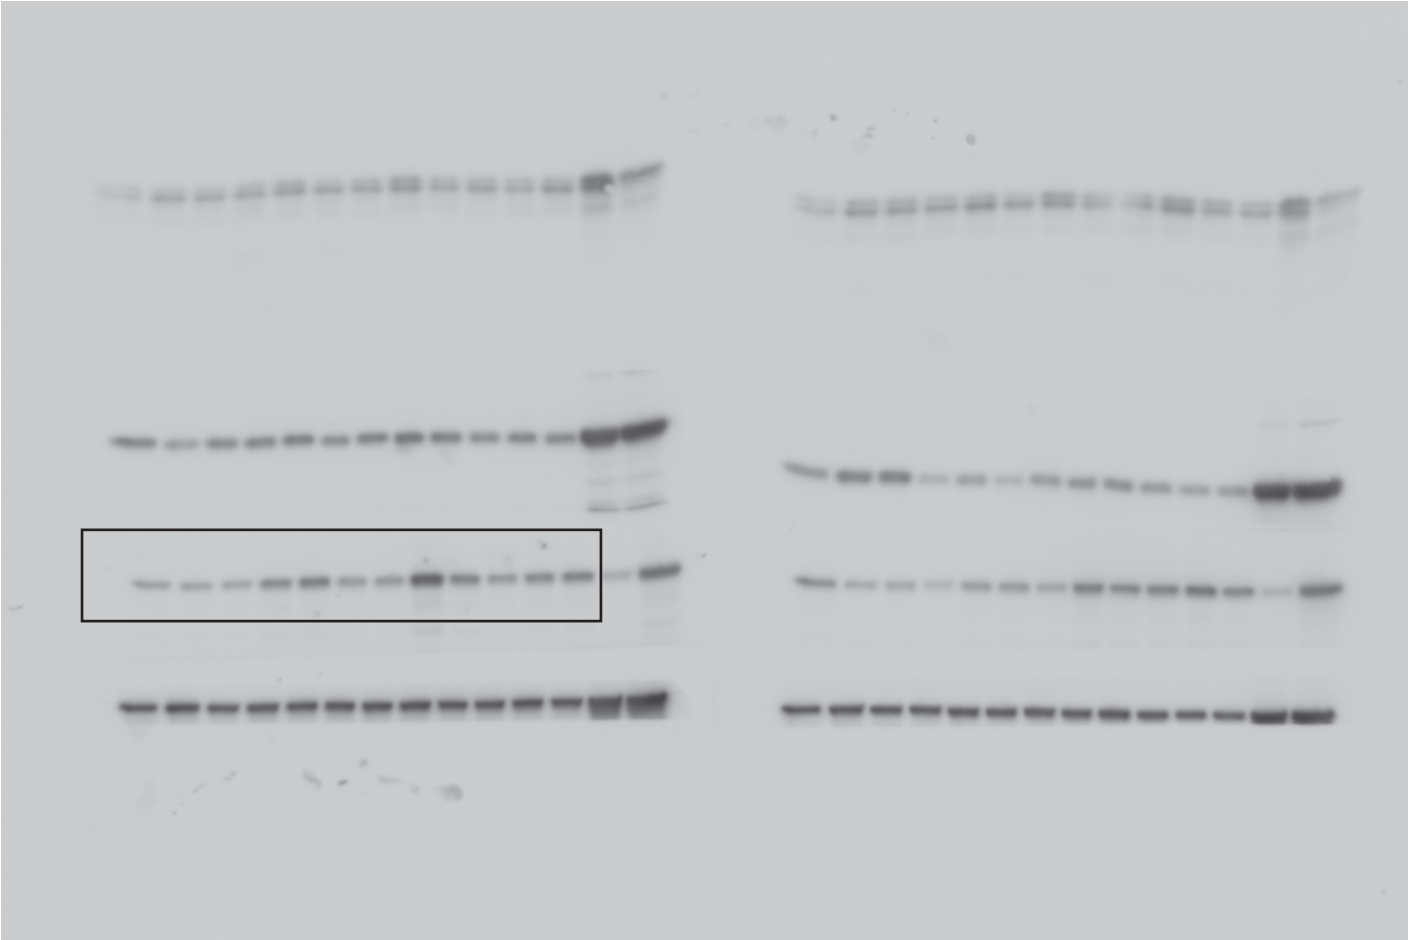

Male AKT

AKT

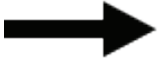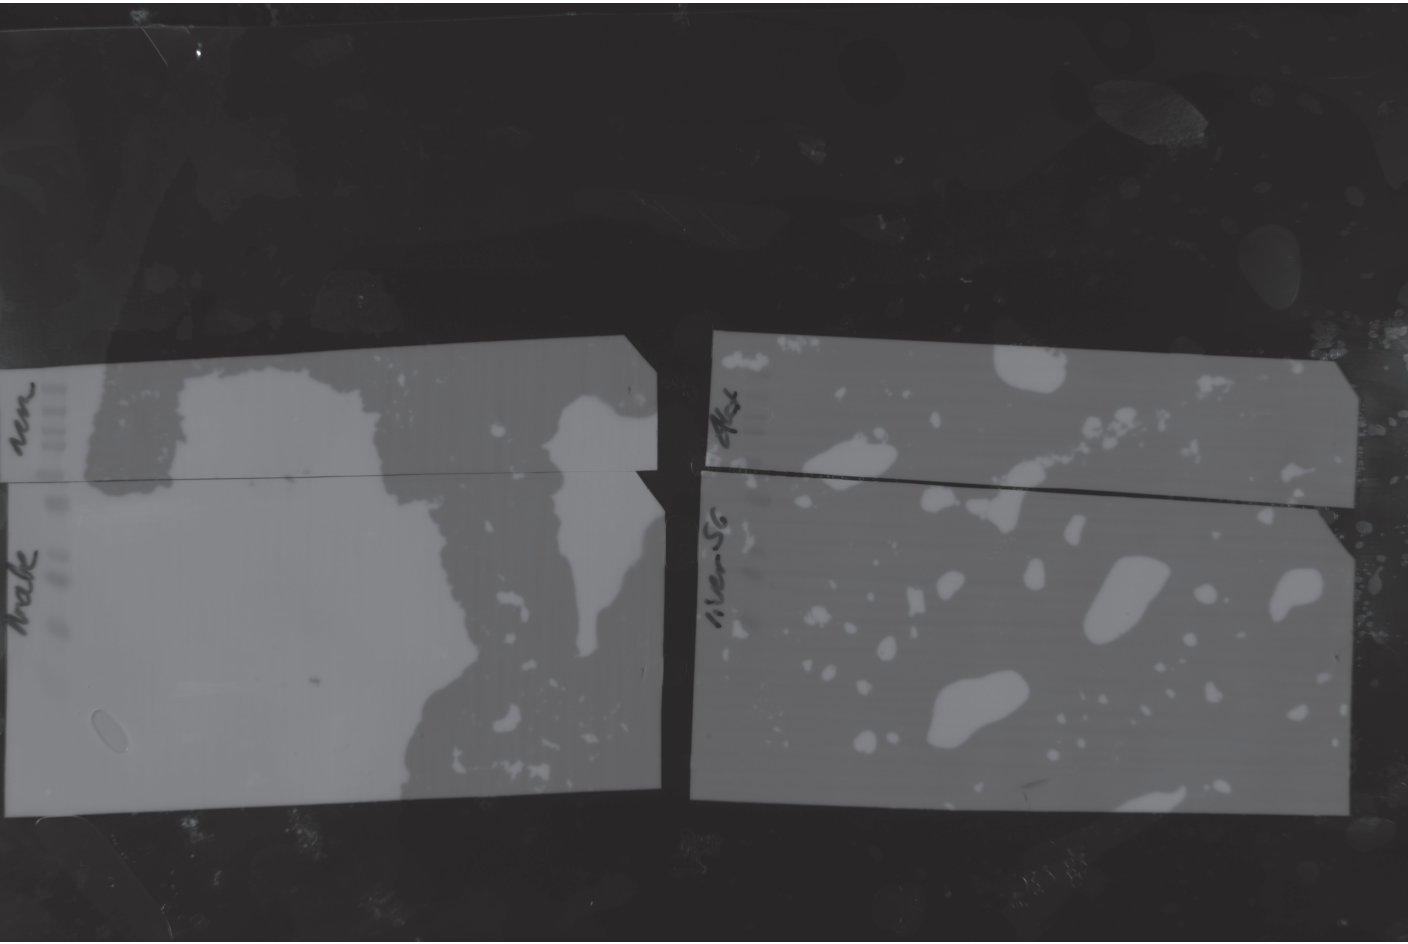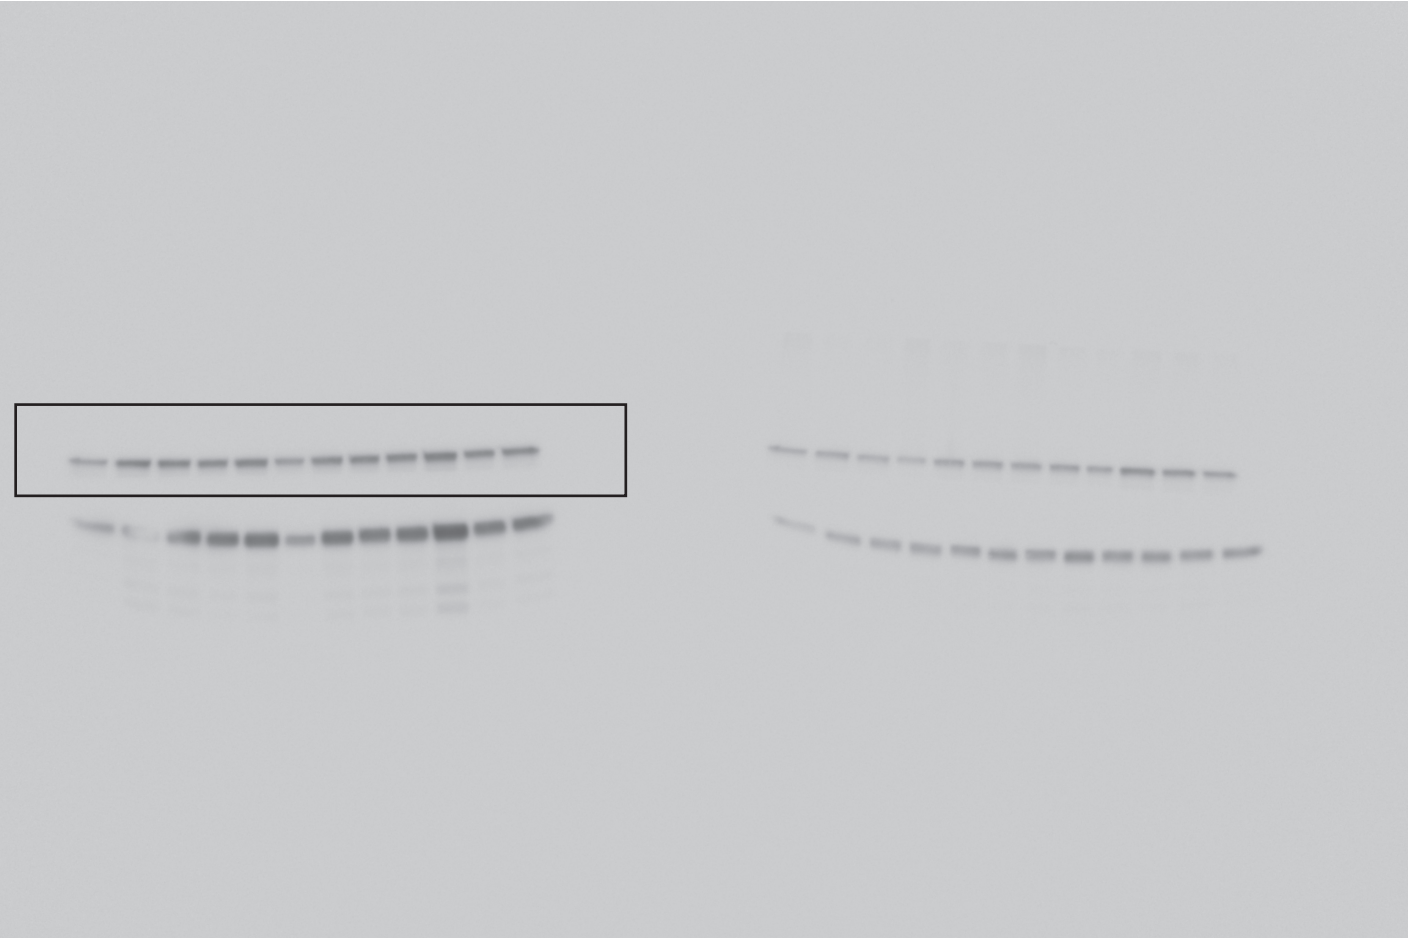

Male p-AKT

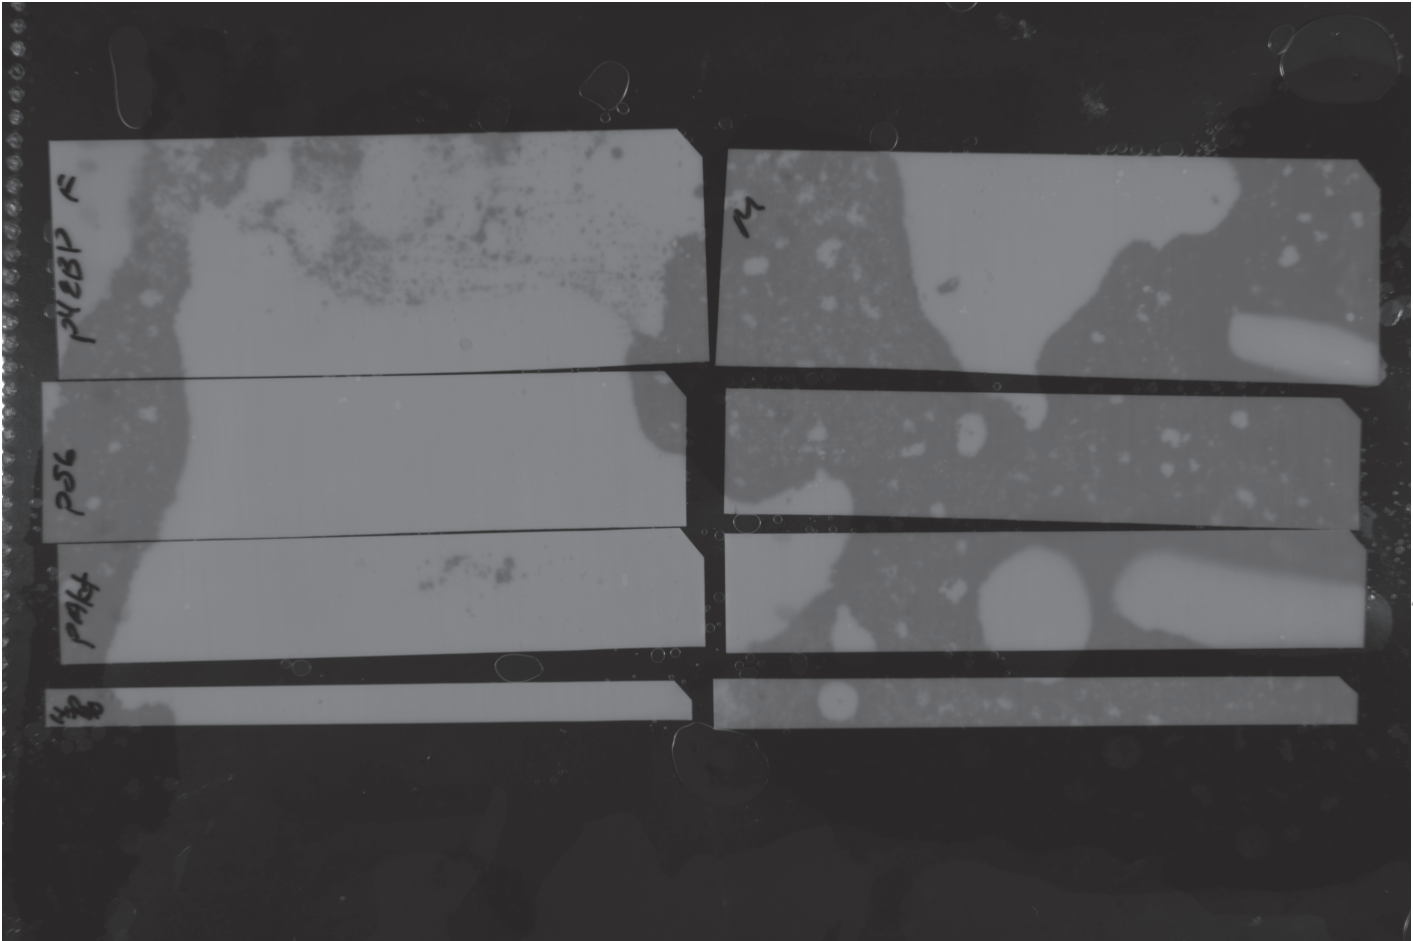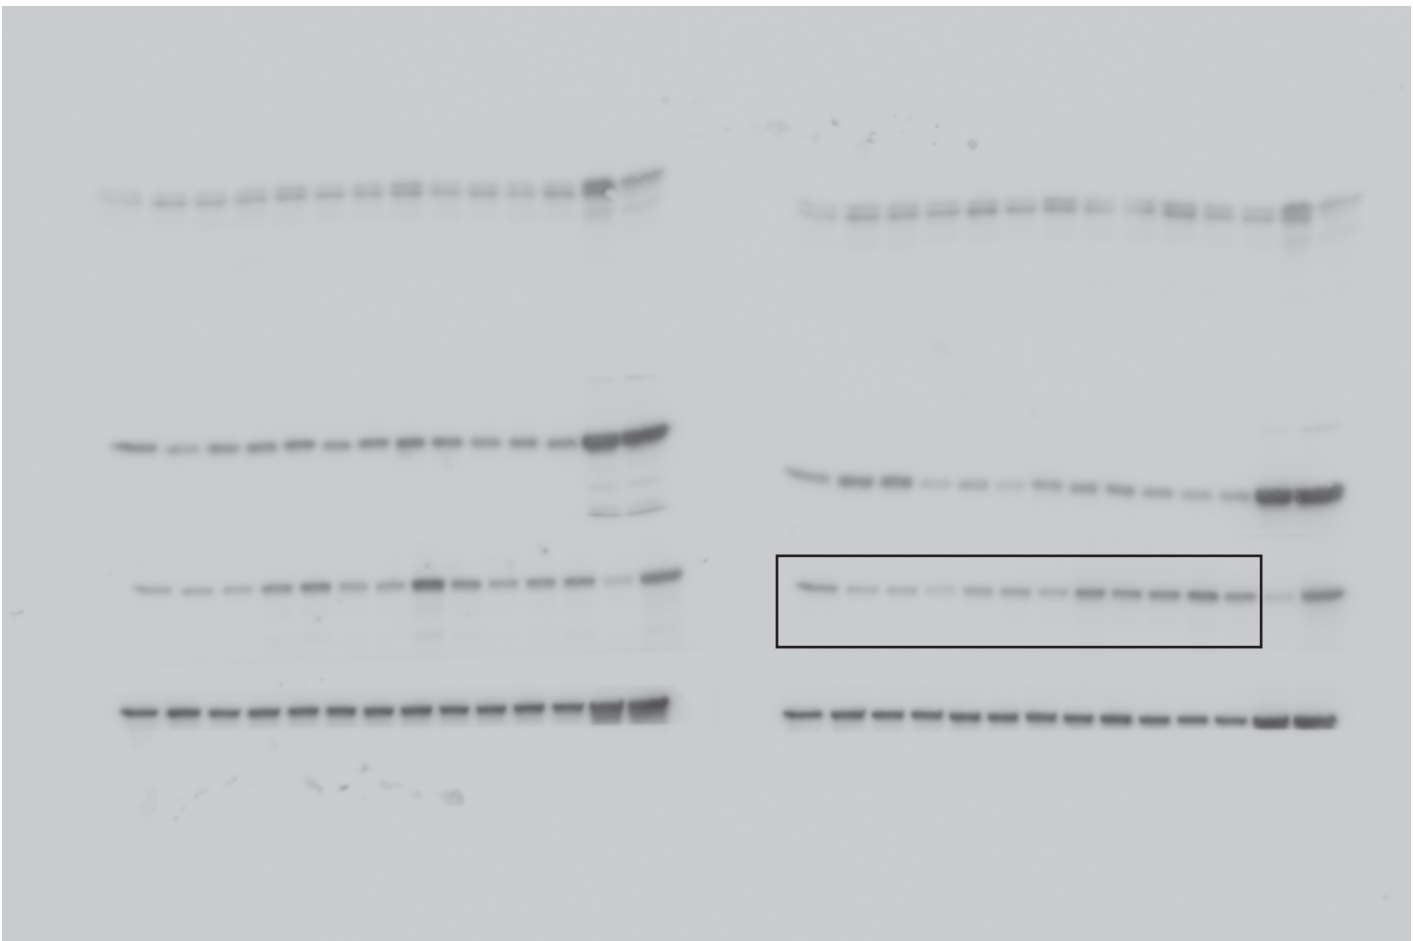

Male and Female HSP90, p-S6

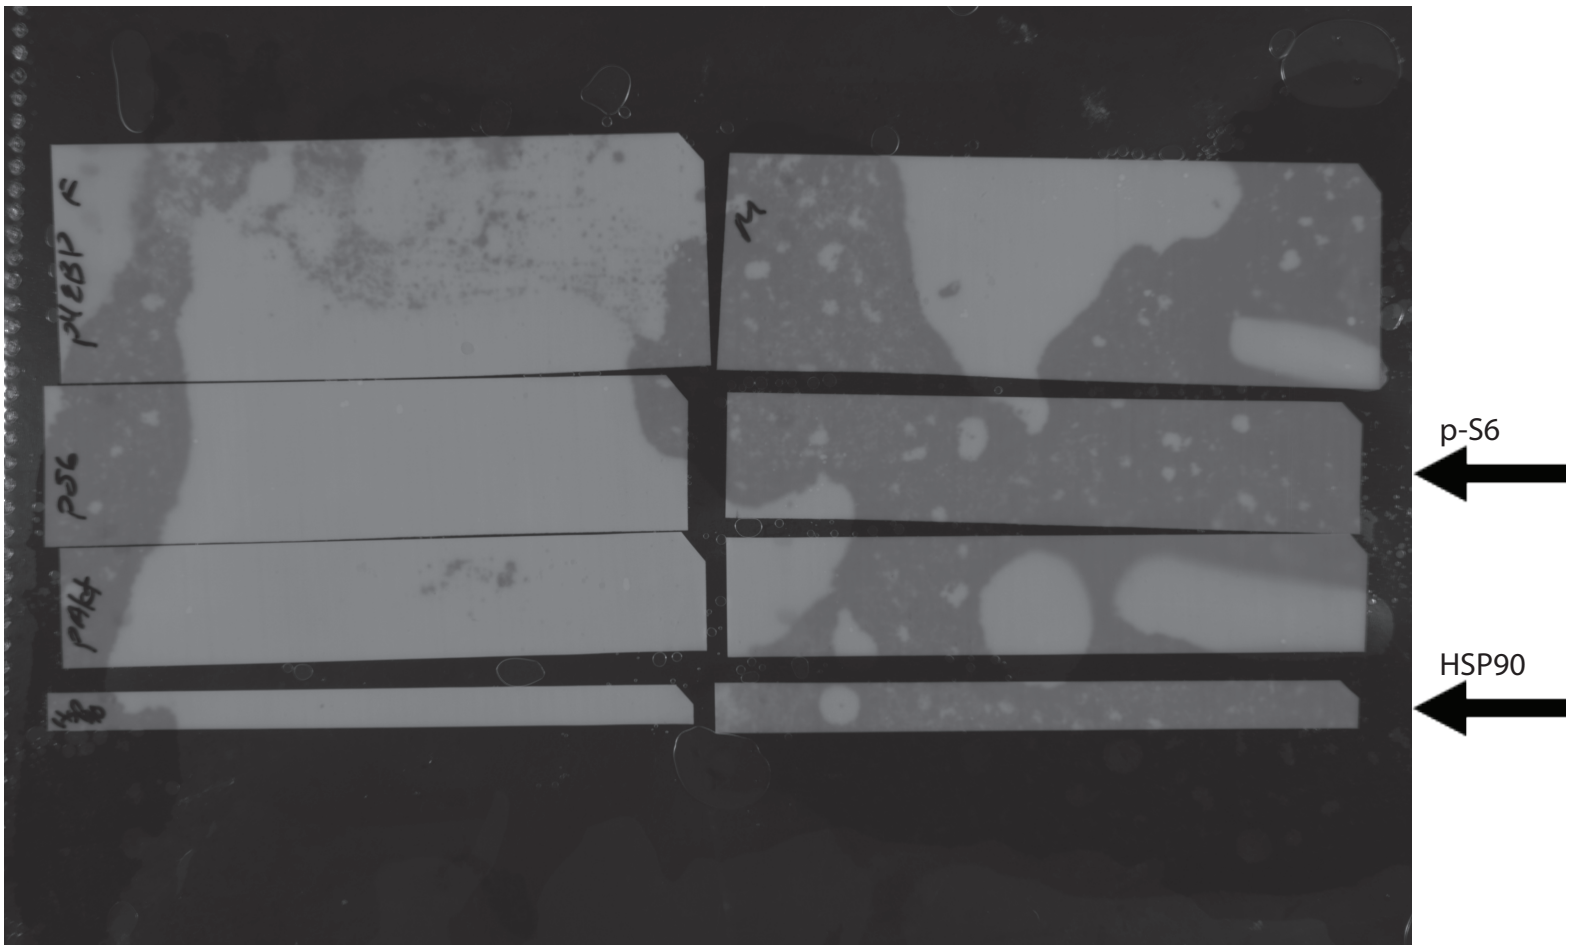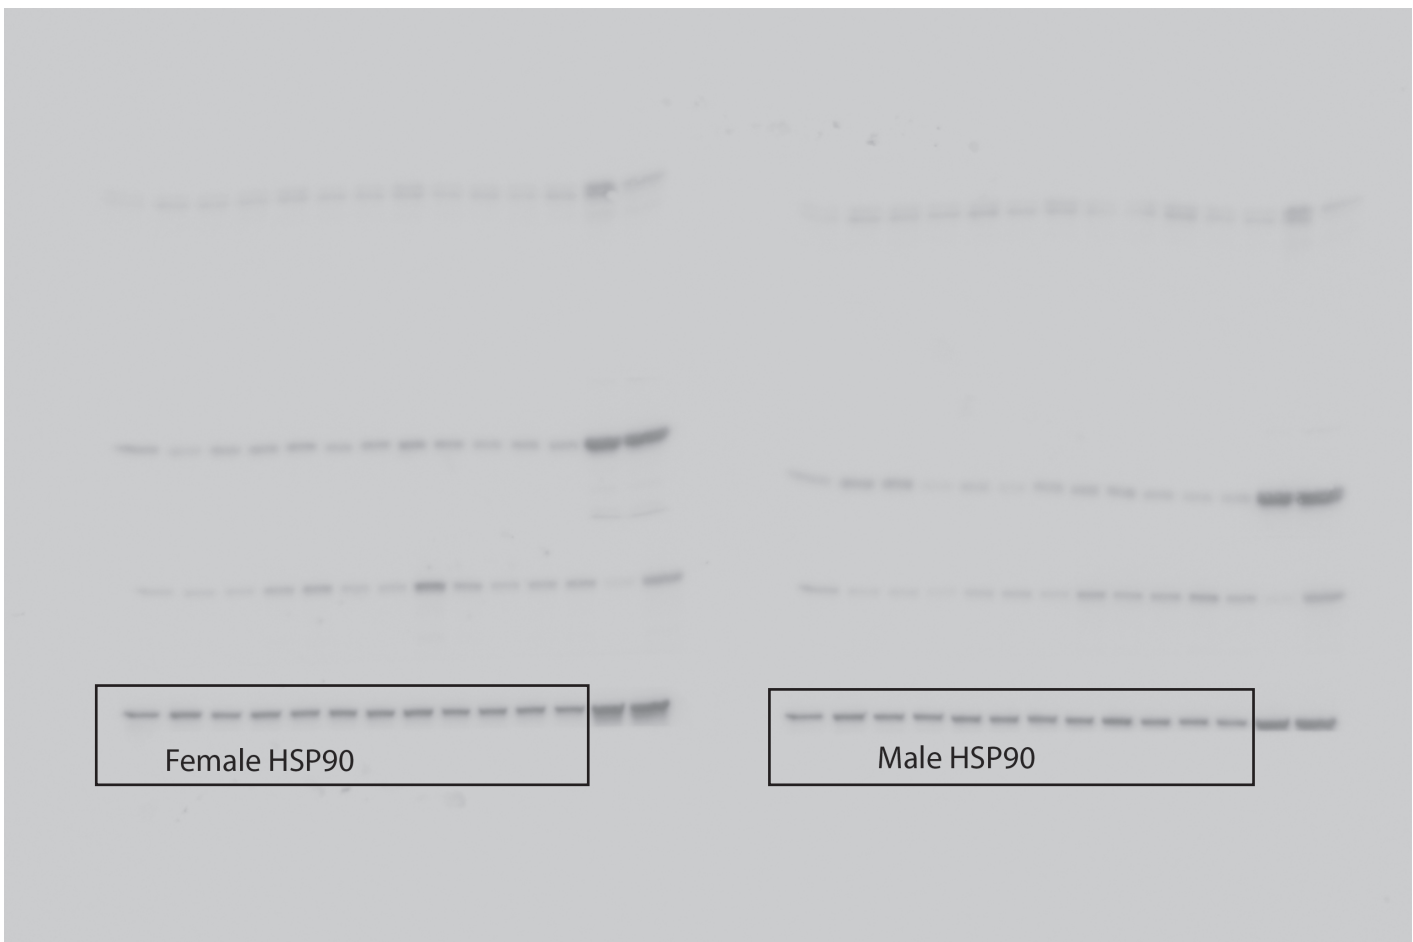

Male and Female HSP90, p-S6

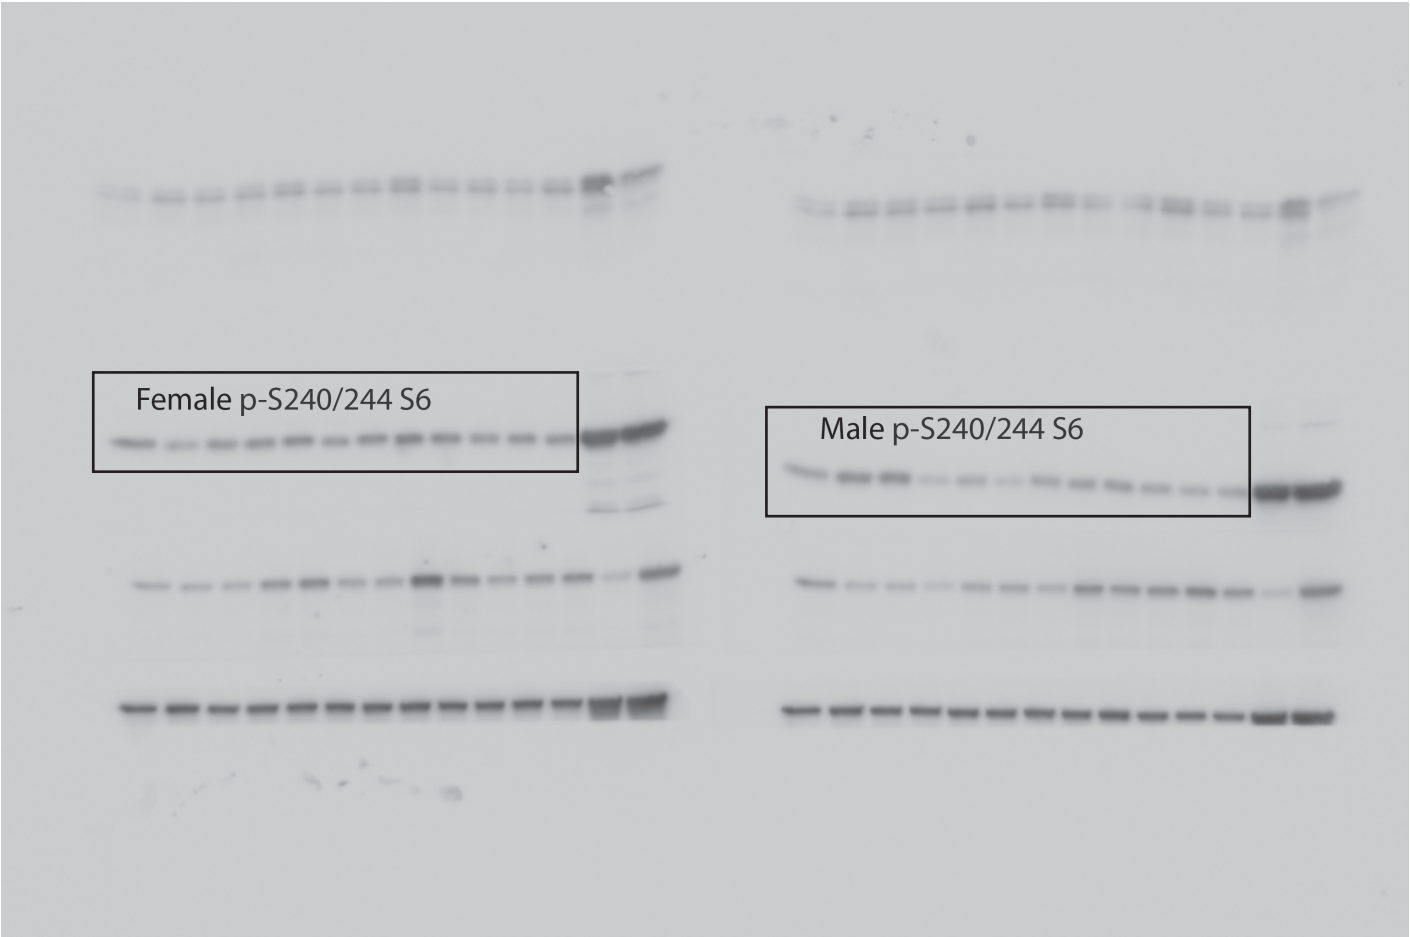

Male and Female p-ULK1, p-S6K1

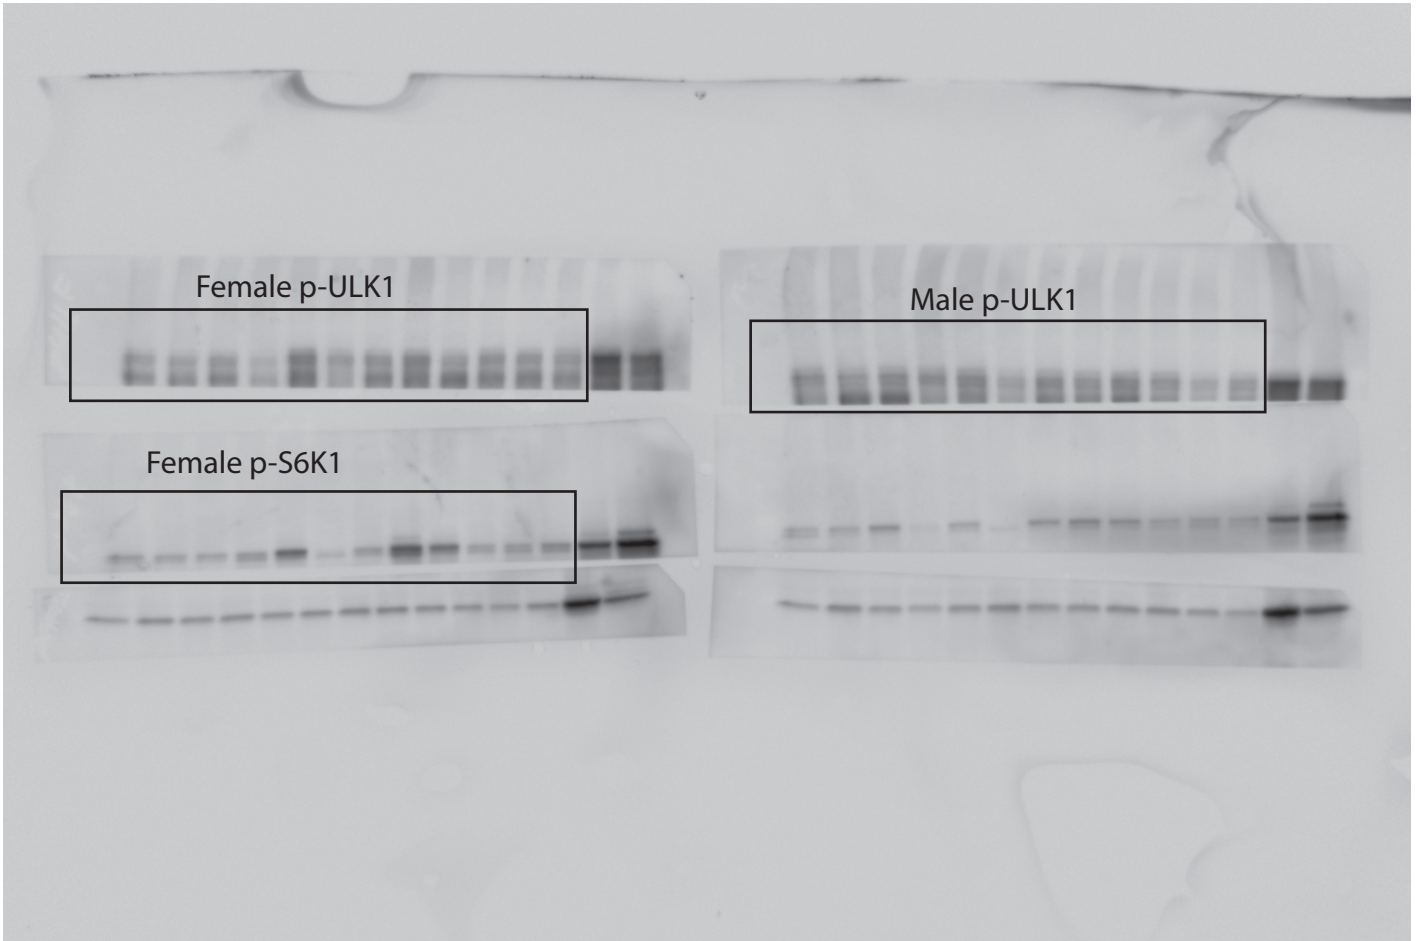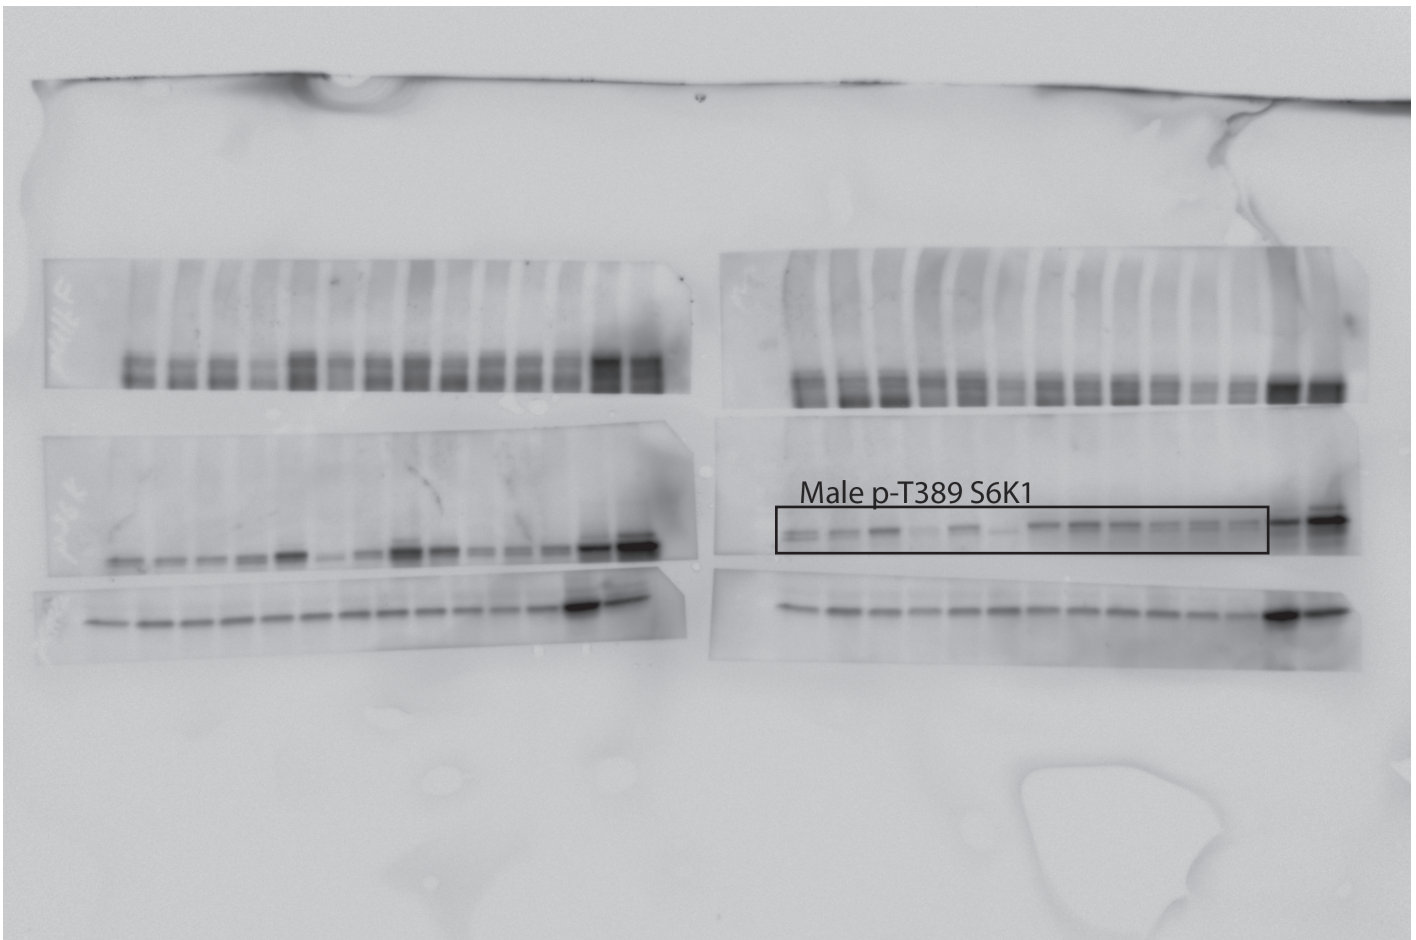

Male and Female S6K1, S6

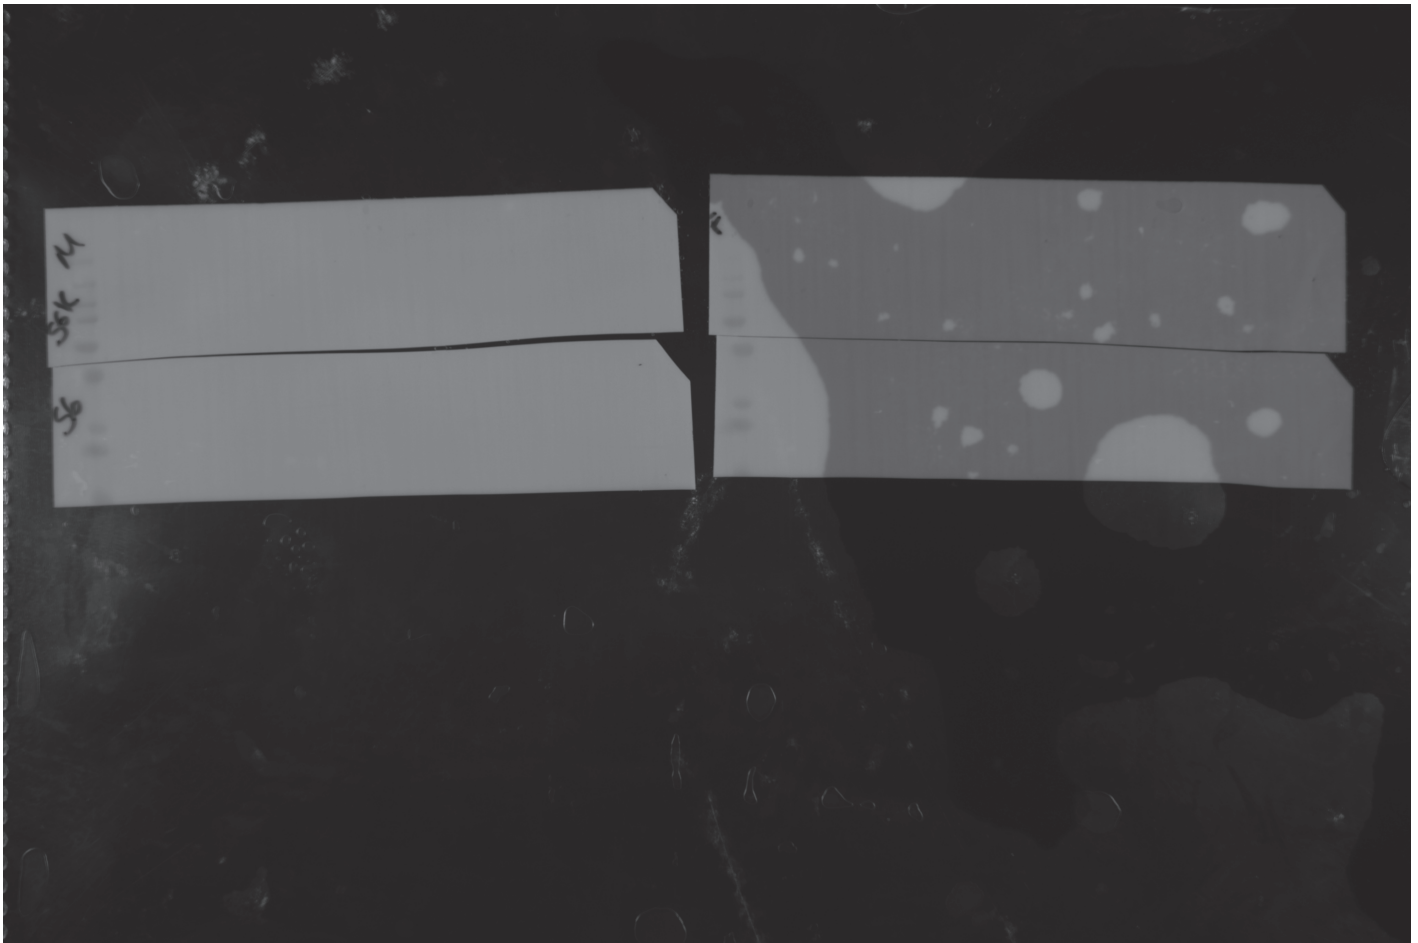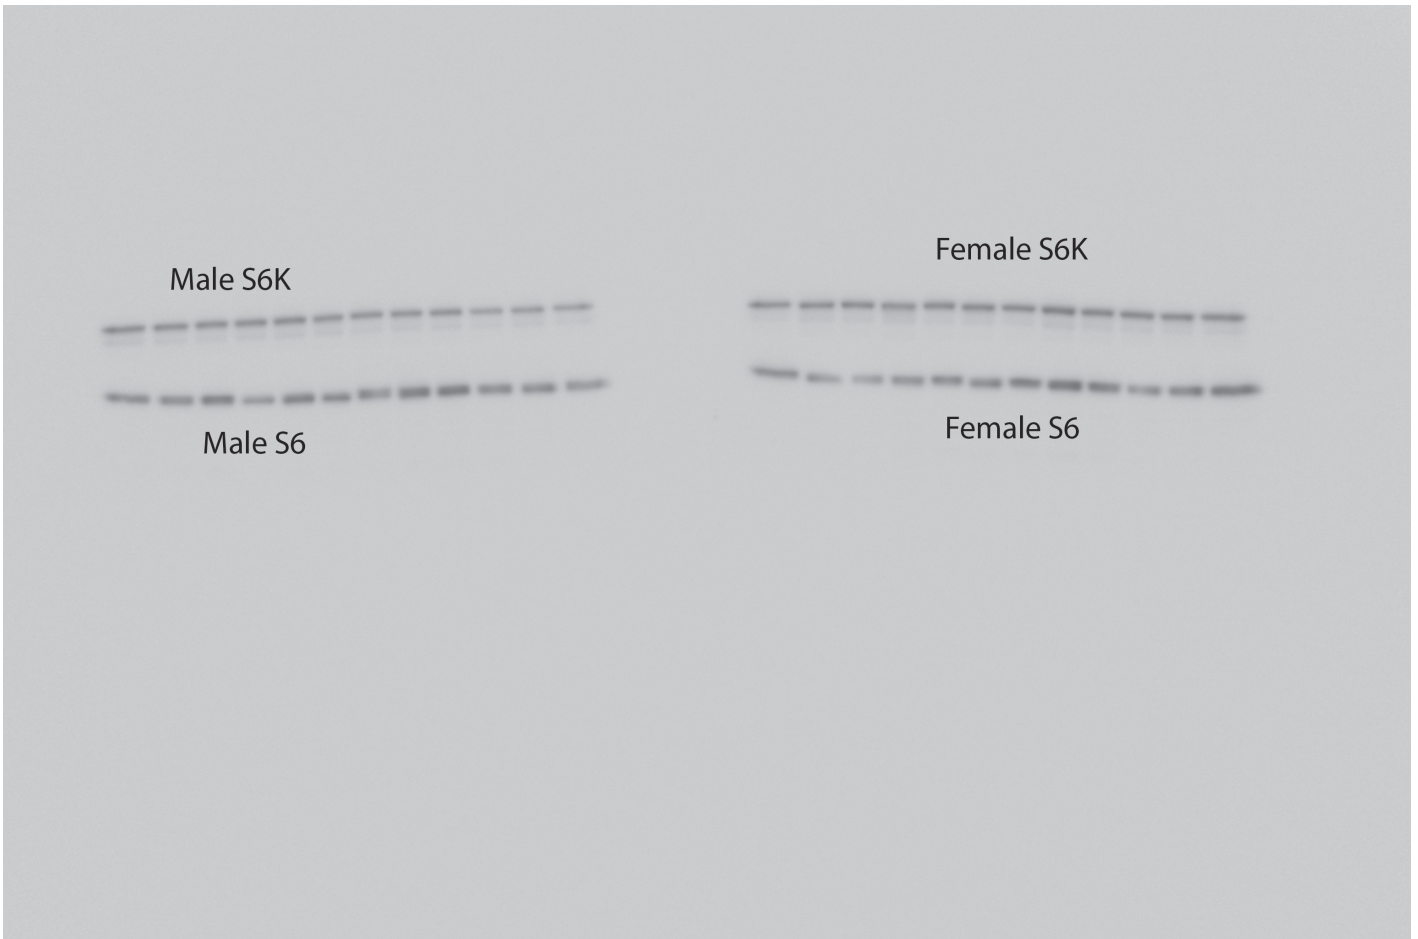



Male and Female ULK1

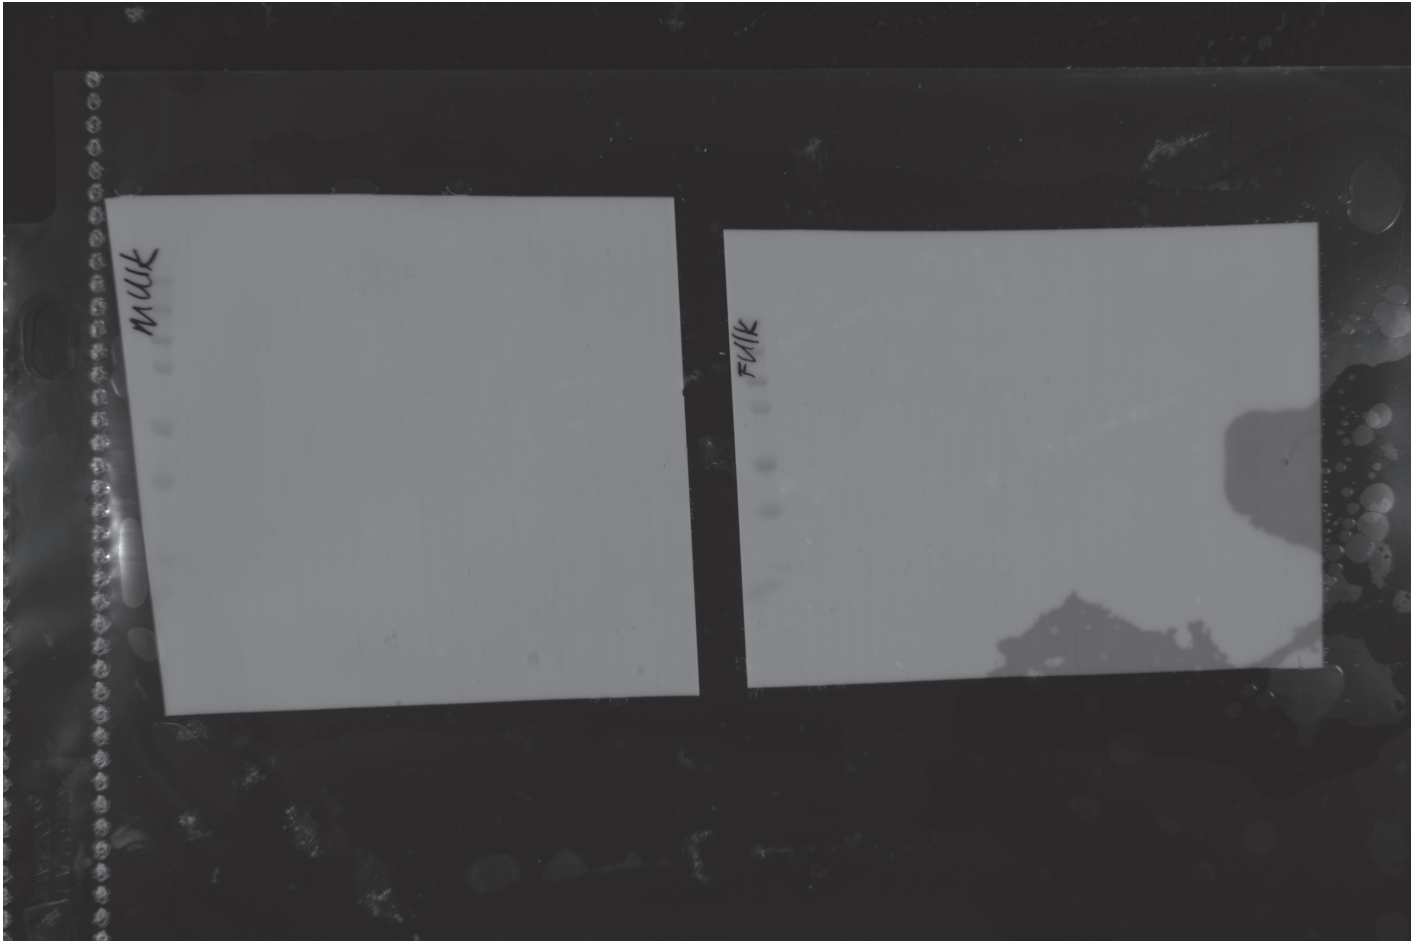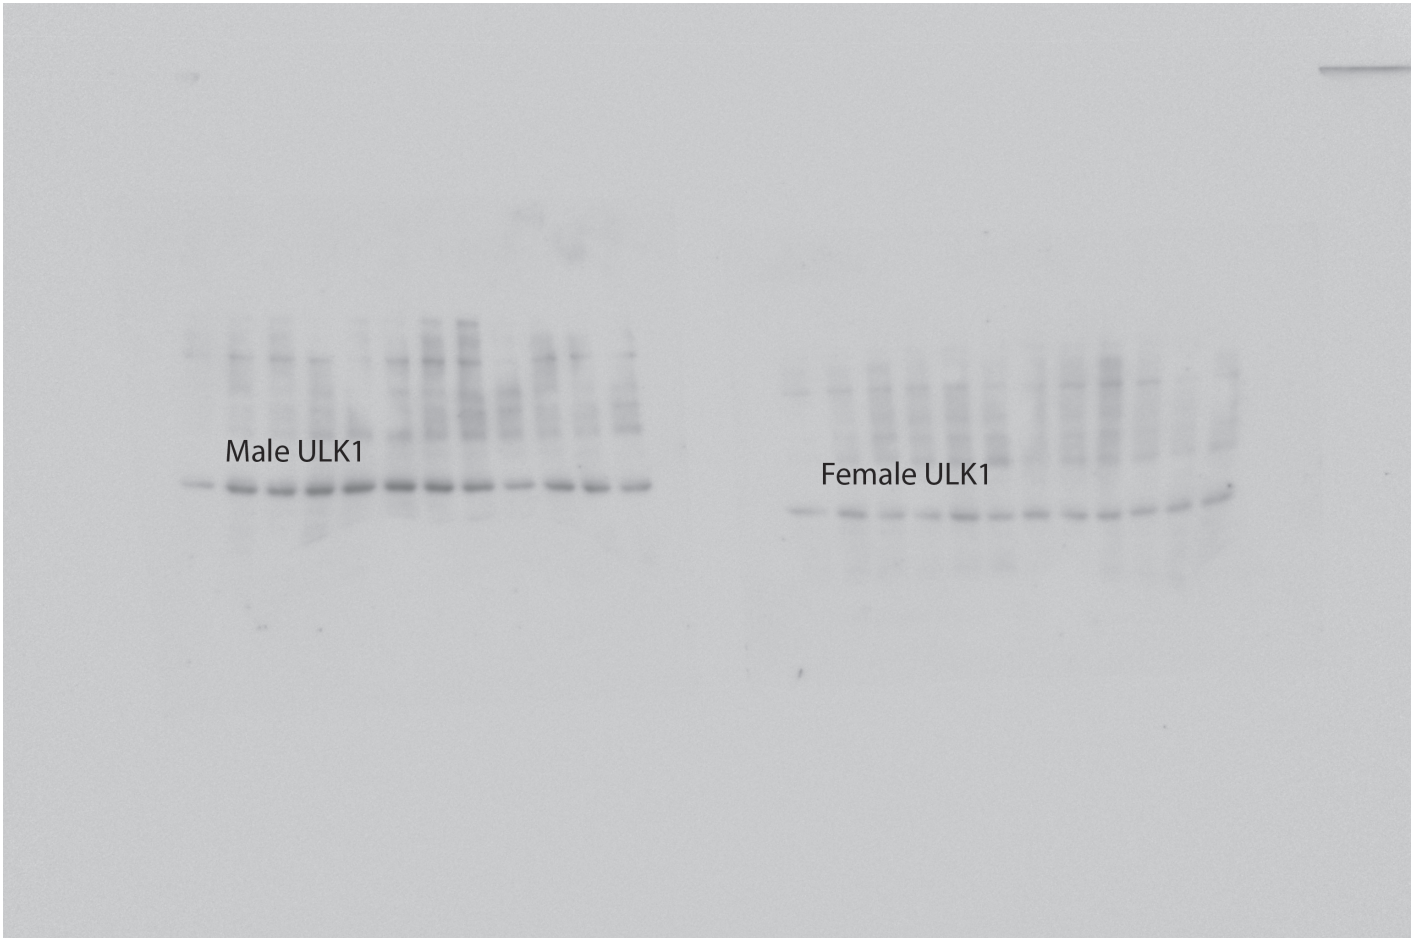

Supplement: NIHMS1644834-supplement-1644834_SourceData_Extended_Data_Fig5.pdf [file NIHMS1644834-supplement-1644834_SourceData_Extended_Data_Fig5.pdf]
