# Supplementary material
Source: PubMed Central journal article supplement (PMC8009080)
Supplement: NIHMS1644834-supplement-1644834_SourceData_Extended_Data_Fig6.pdf [file NIHMS1644834-supplement-1644834_SourceData_Extended_Data_Fig6.pdf]

Male S6, AKT

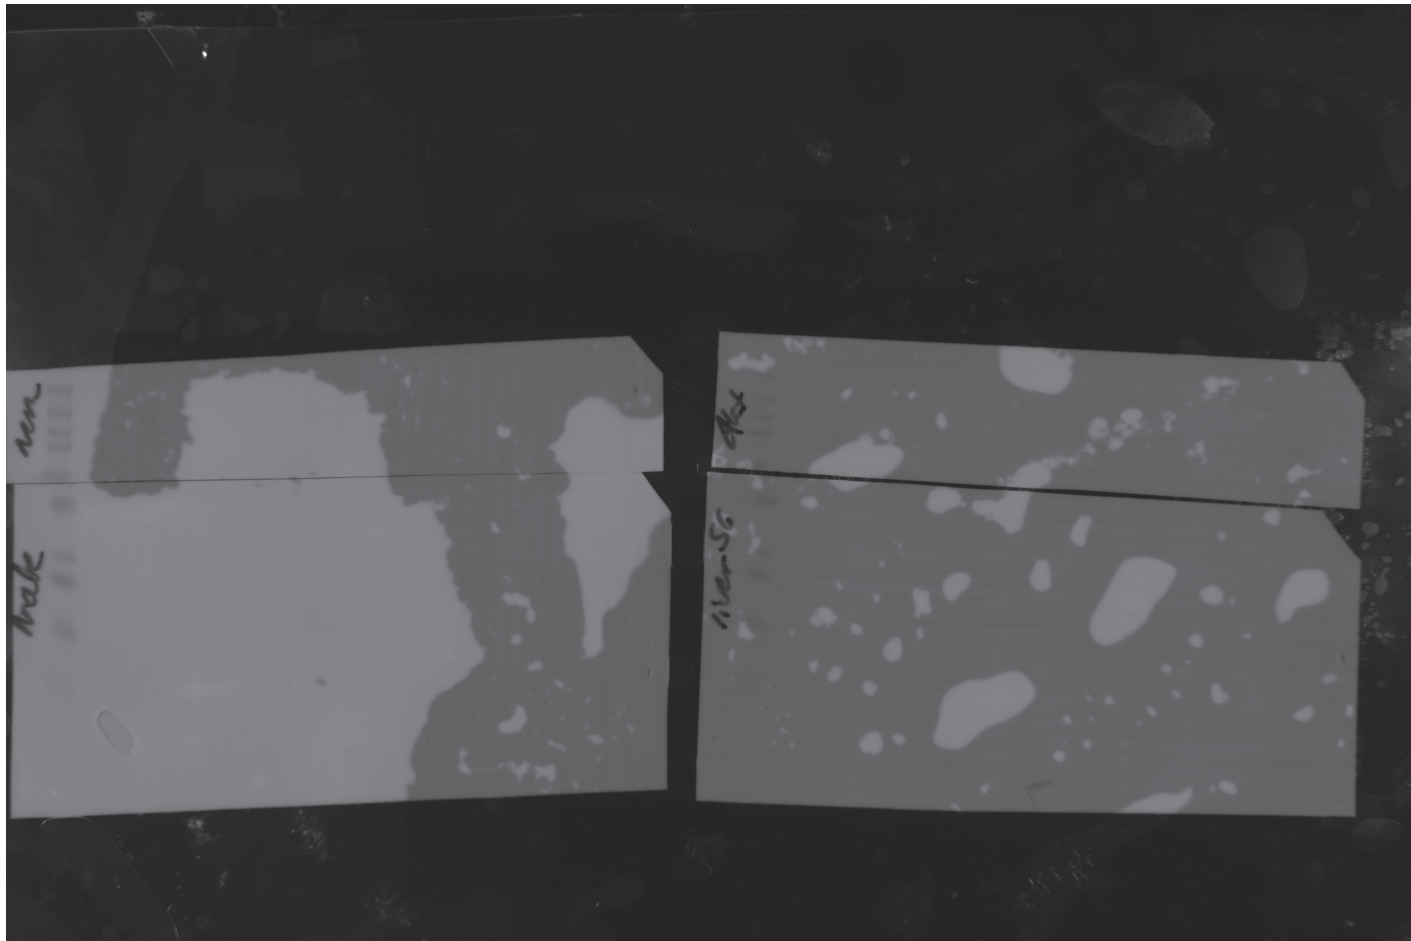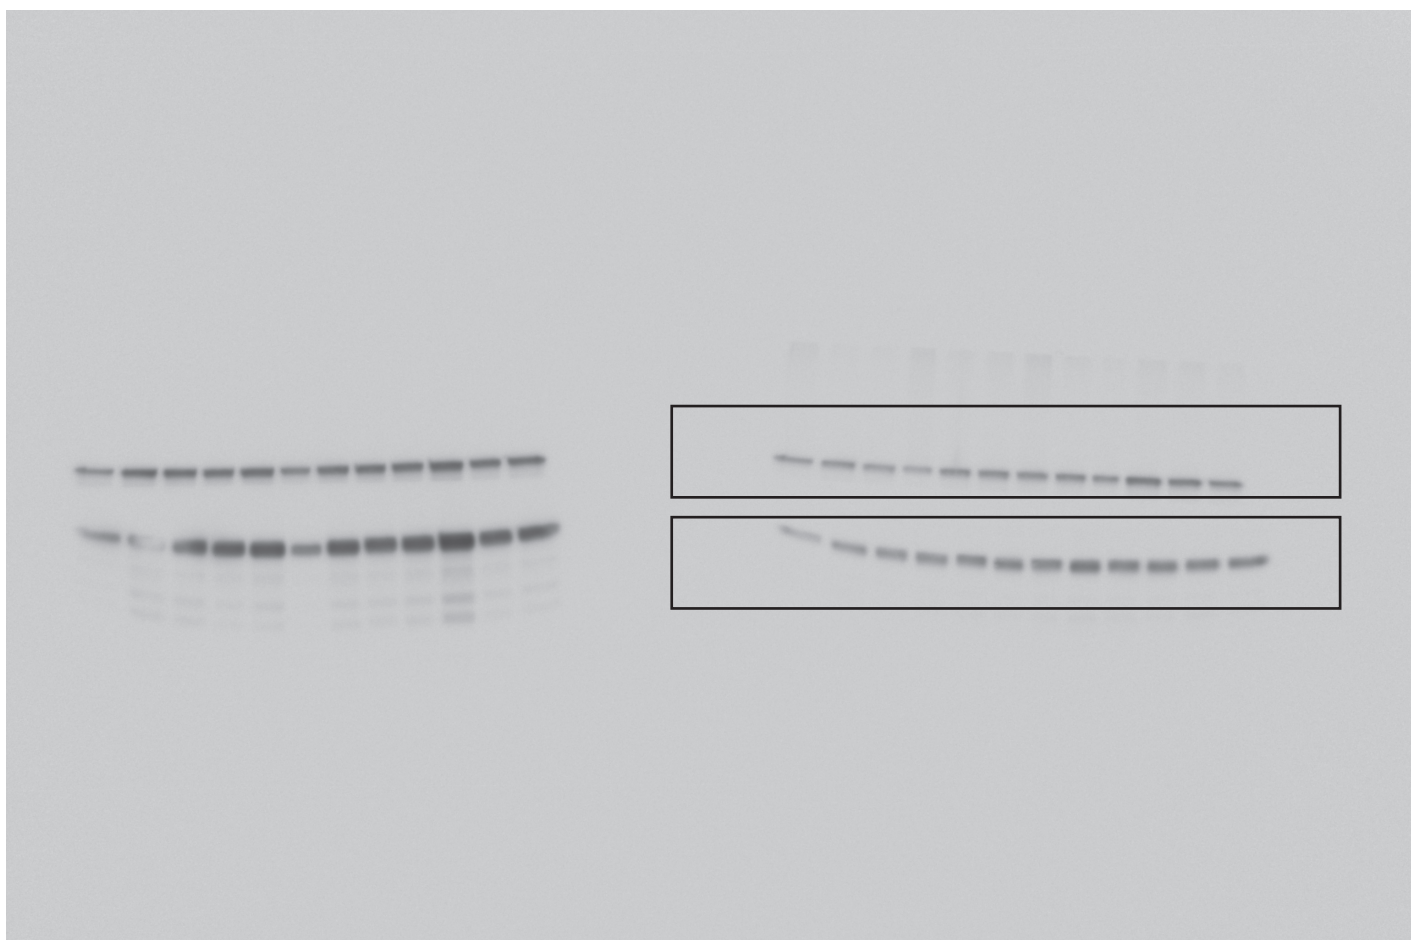

Male p-S473 AKT, p-S240/244 S6, HSP90

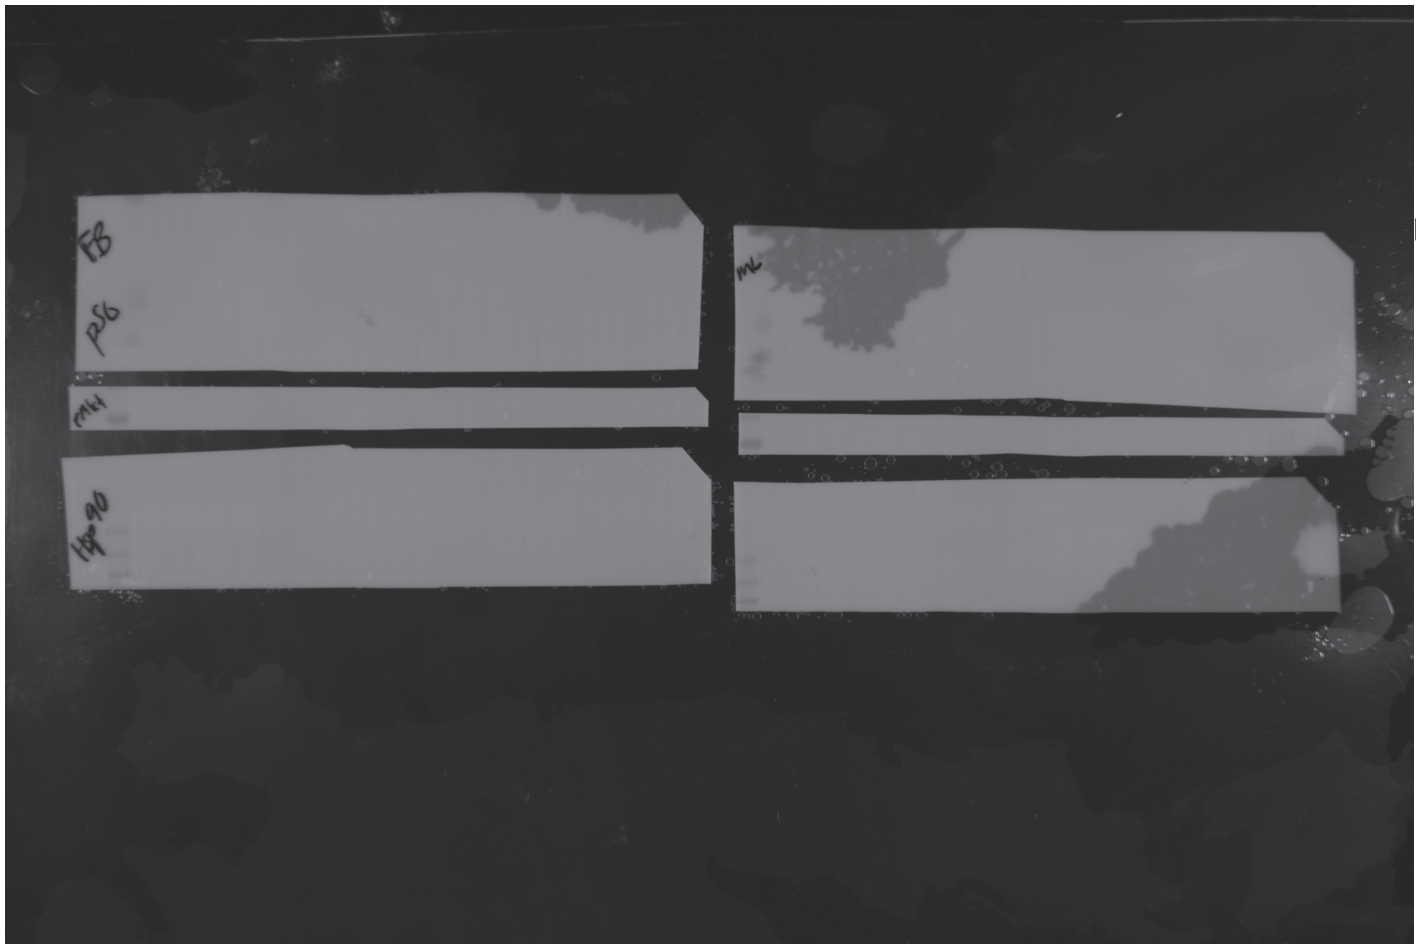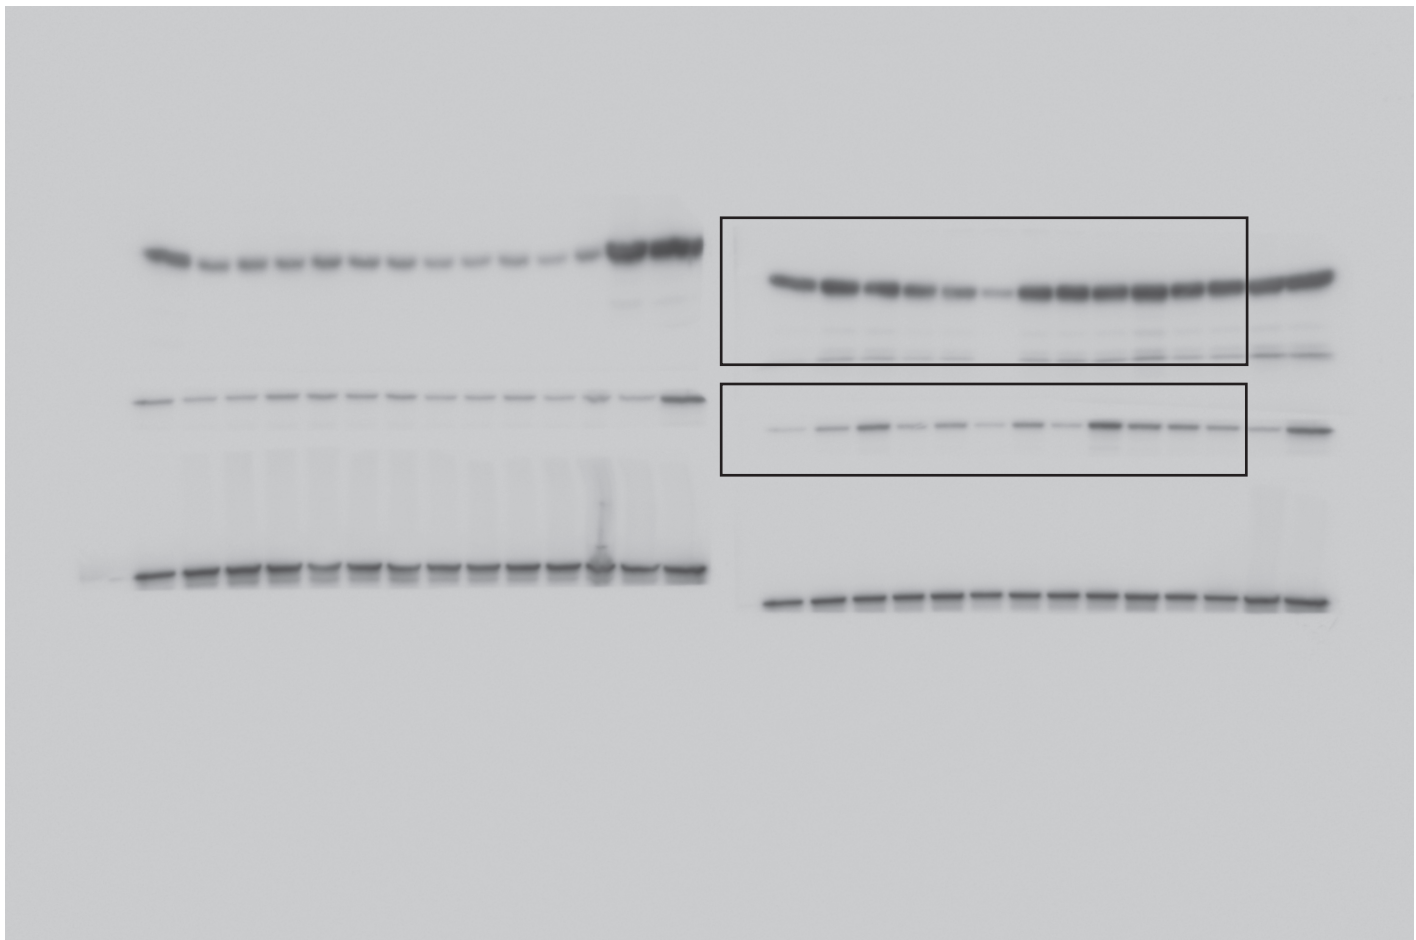

Male p-S473 AKT, p-S240/244 S6, HSP90, ULK1

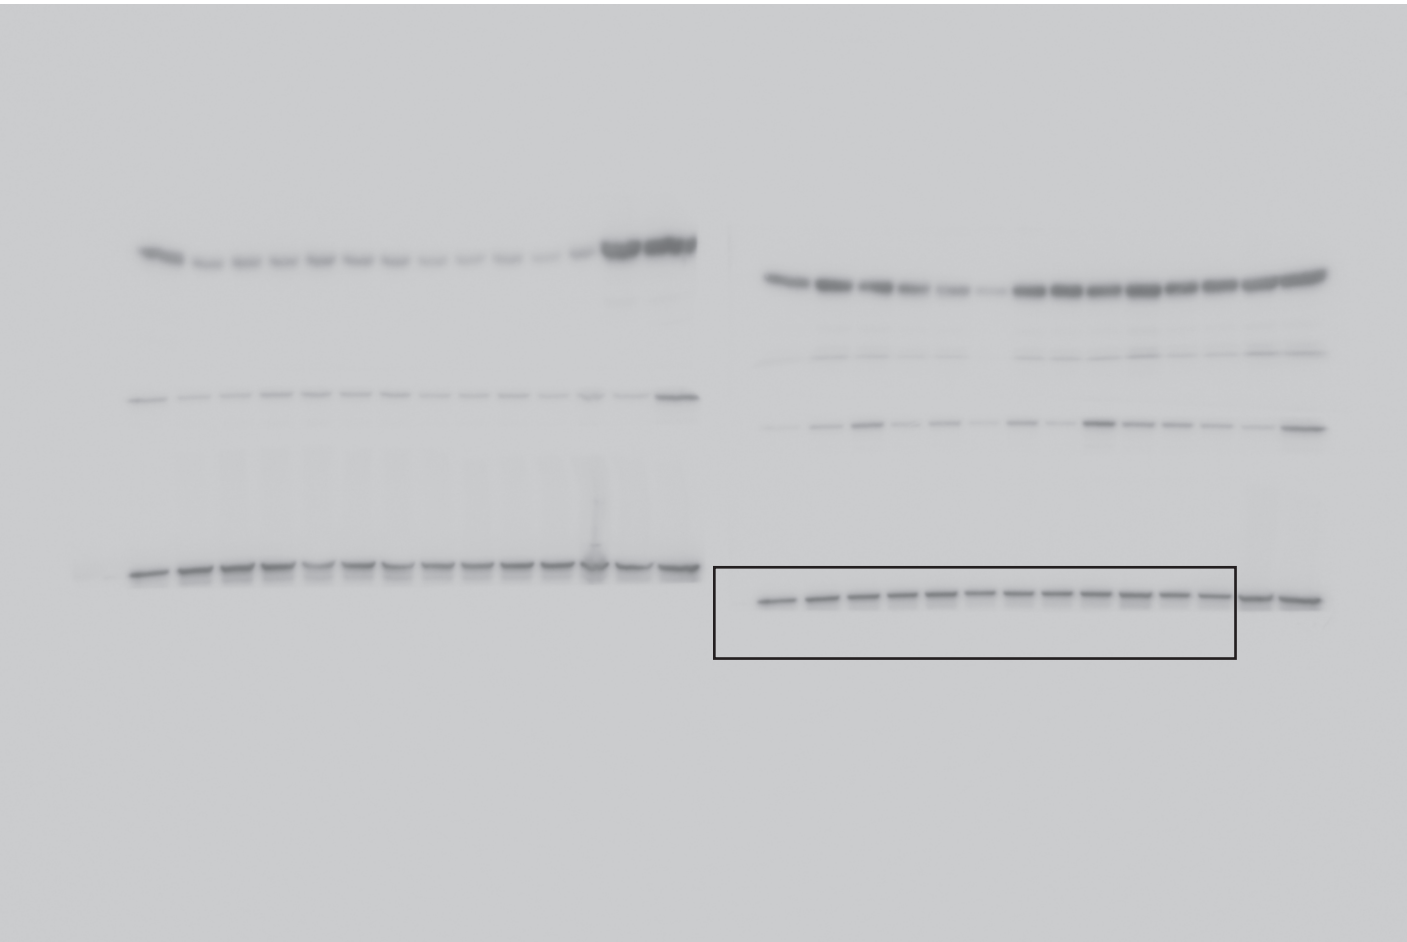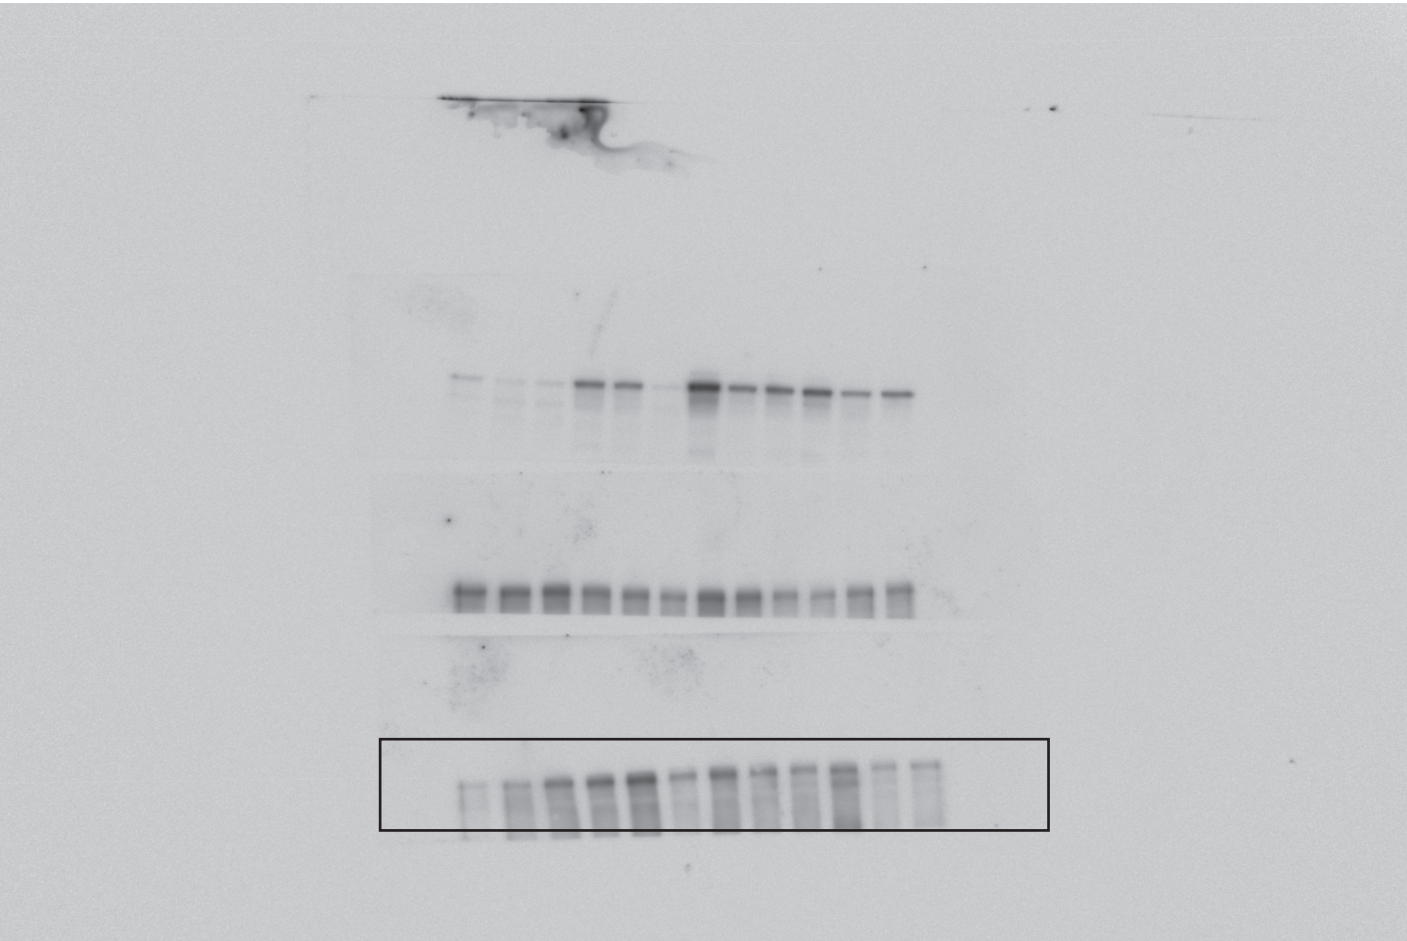

Male p-T389 S6K1, S6K1

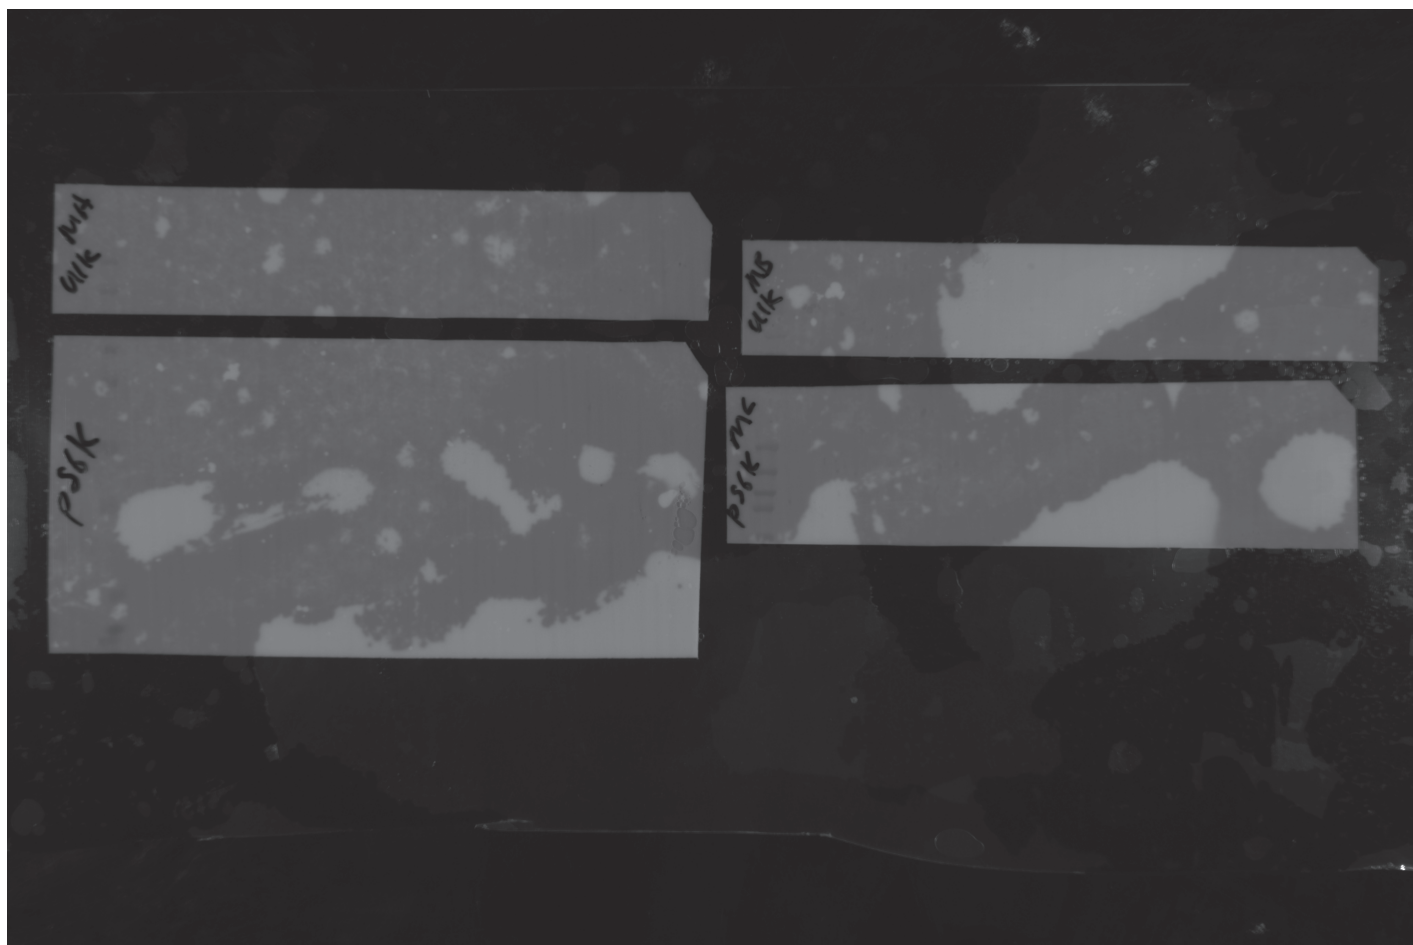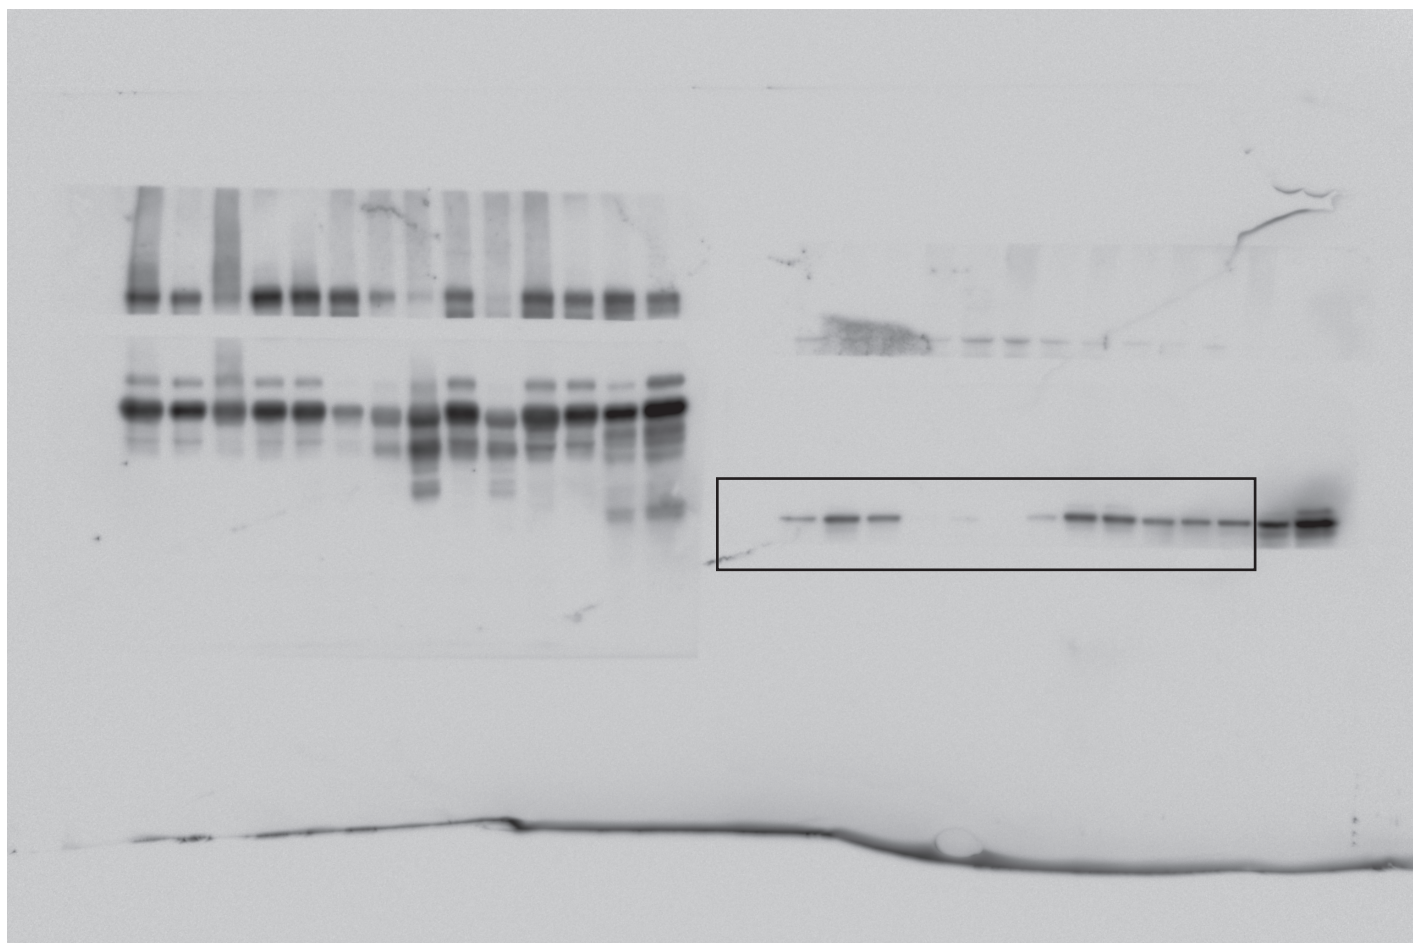

Male p-T389 S6K1, S6K1

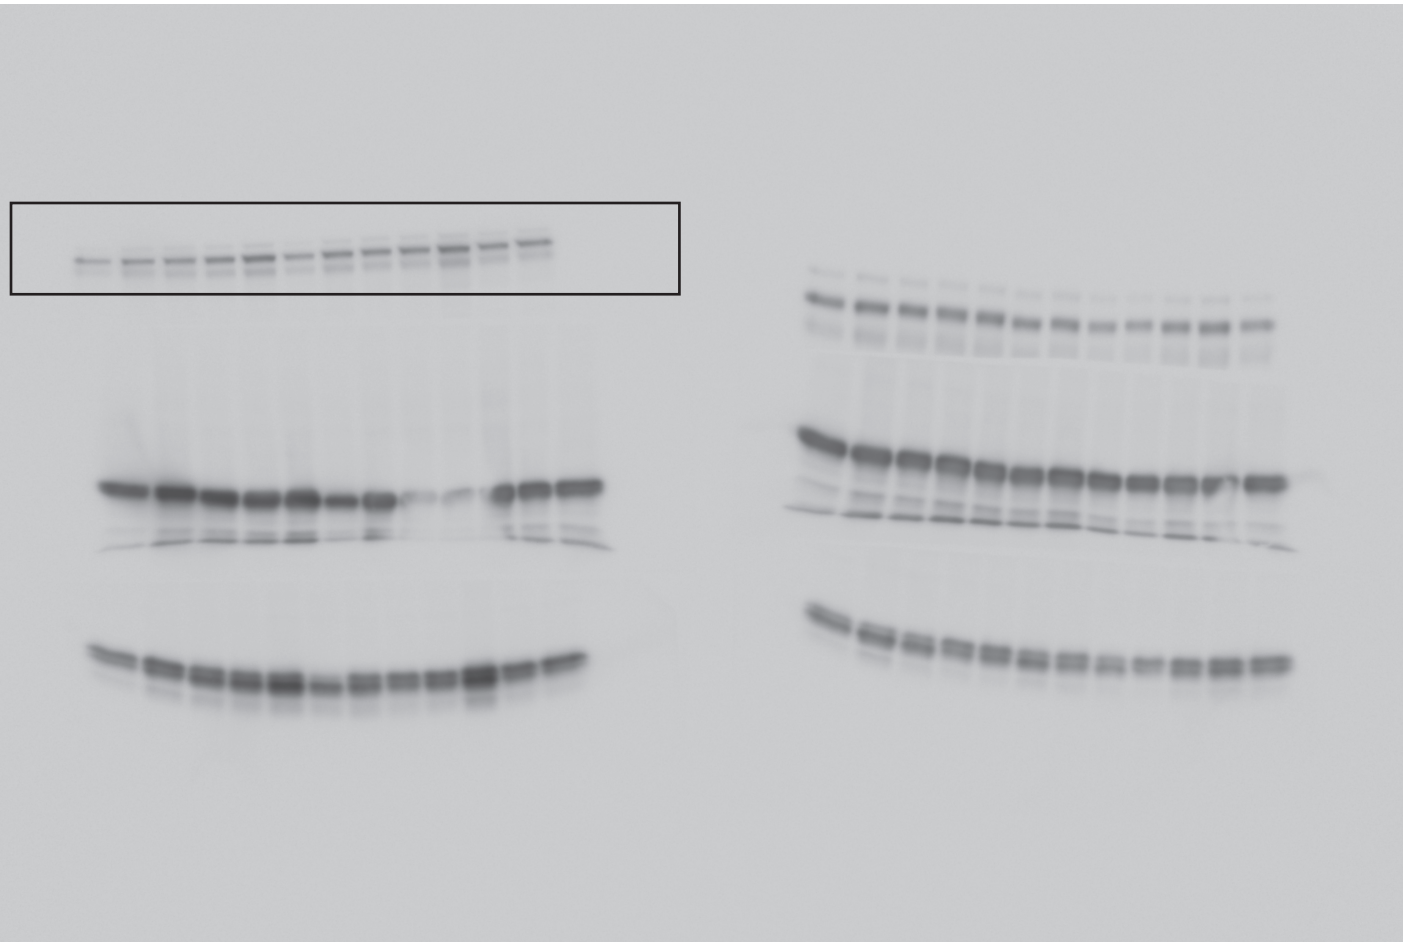

S6K1

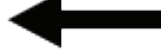

Male p-S757 ULK1

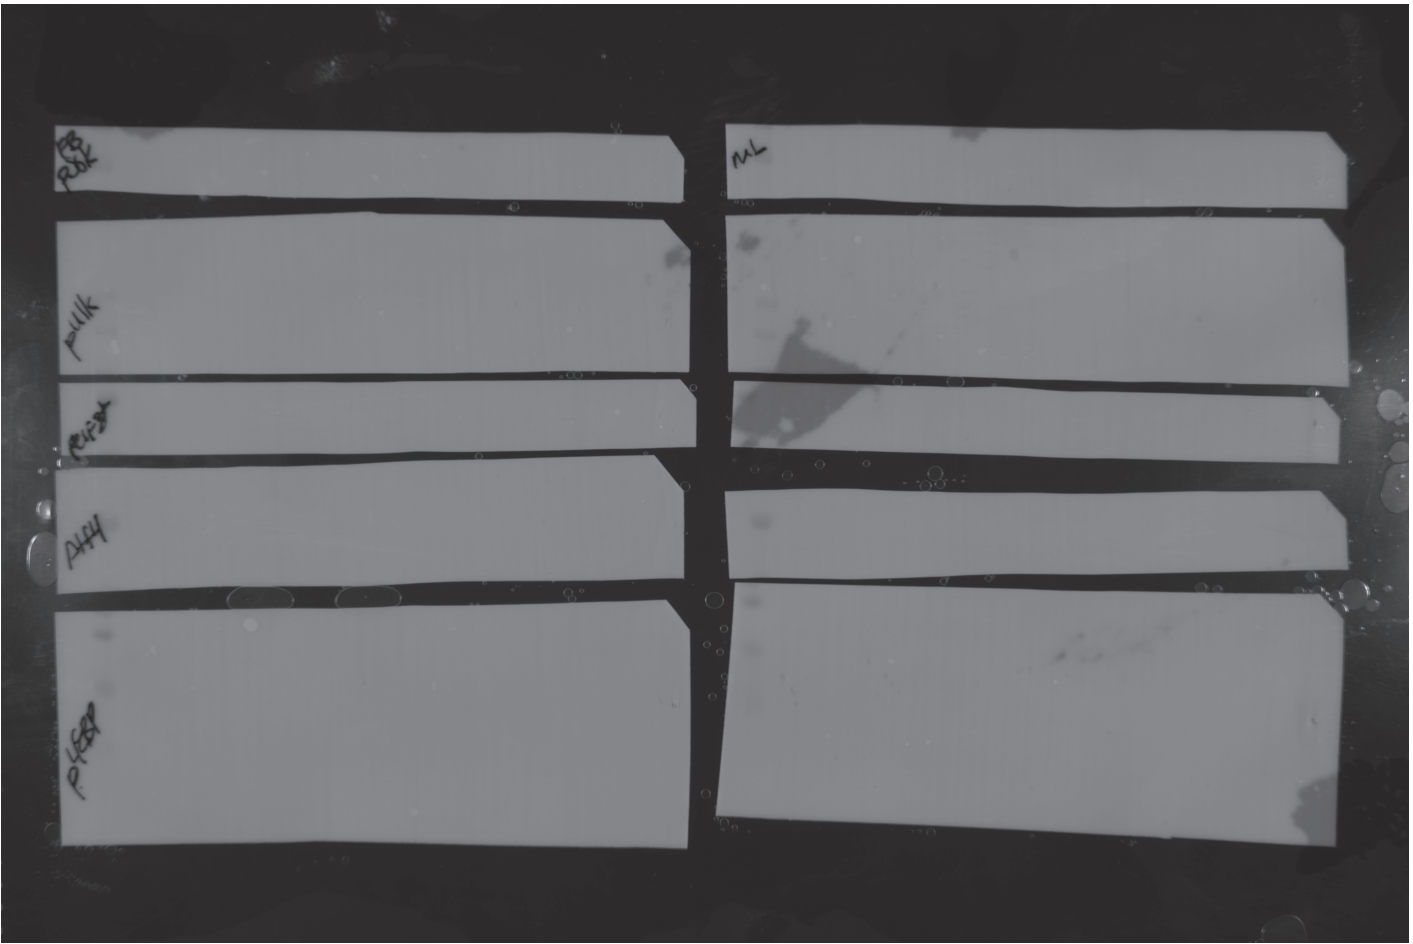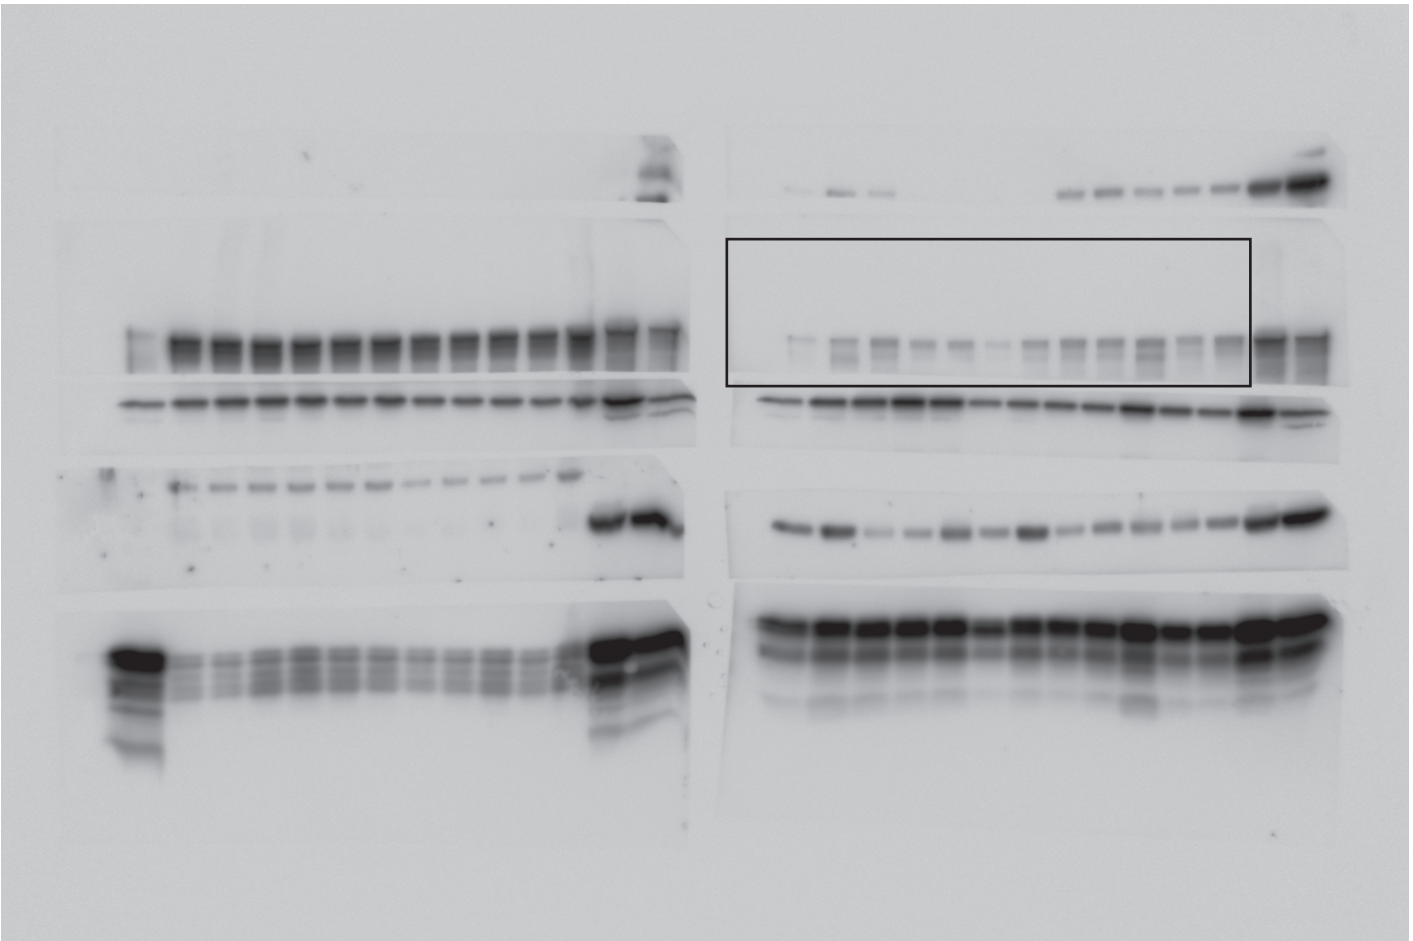

Female S6, AKT

AKT  
→

S6  
→

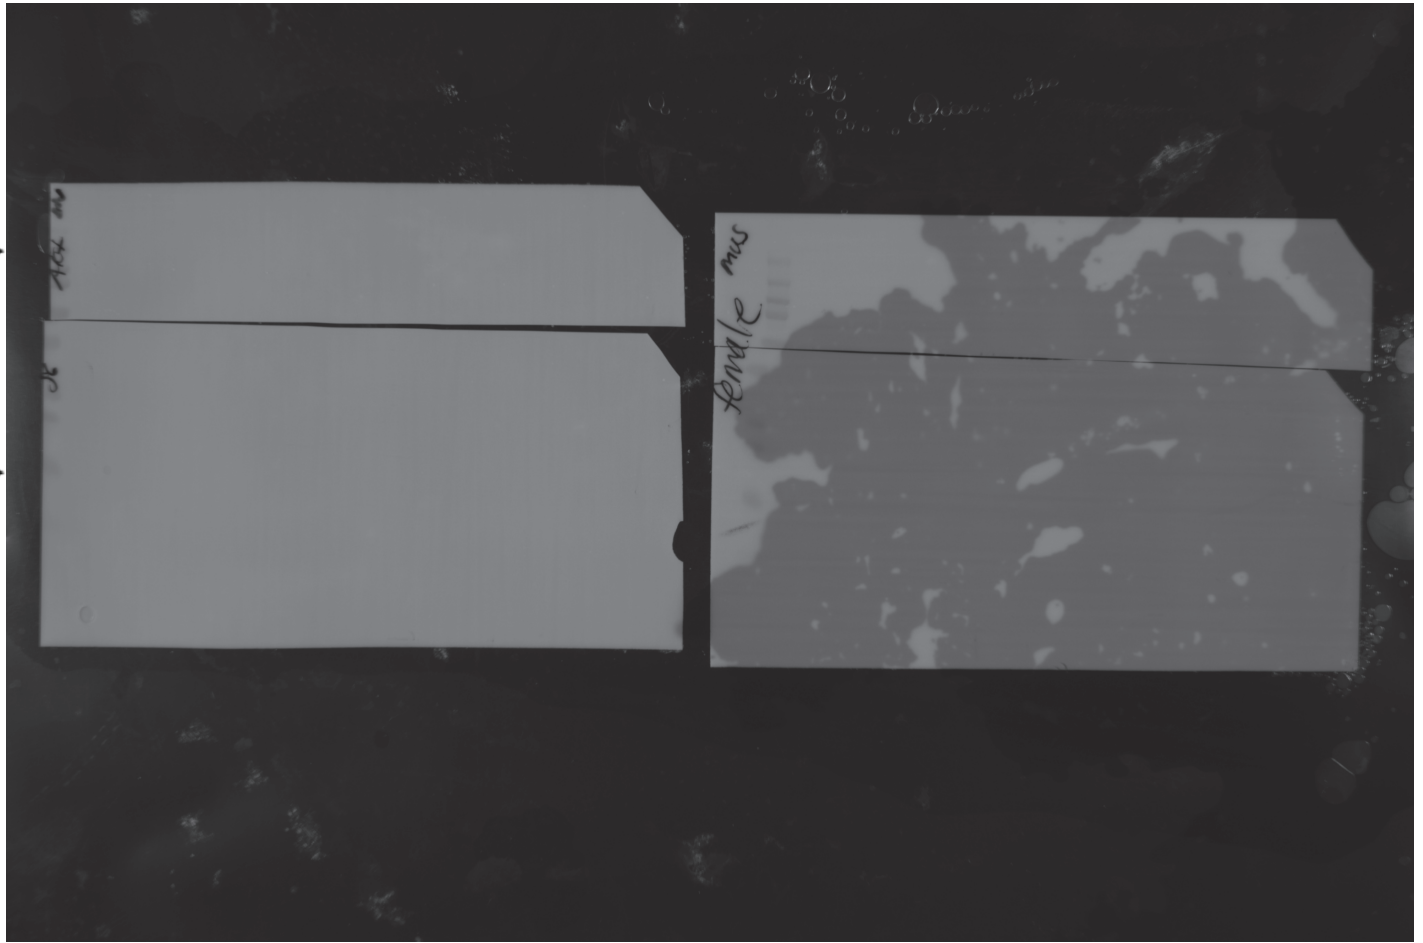

AKT  
→

S6  
→

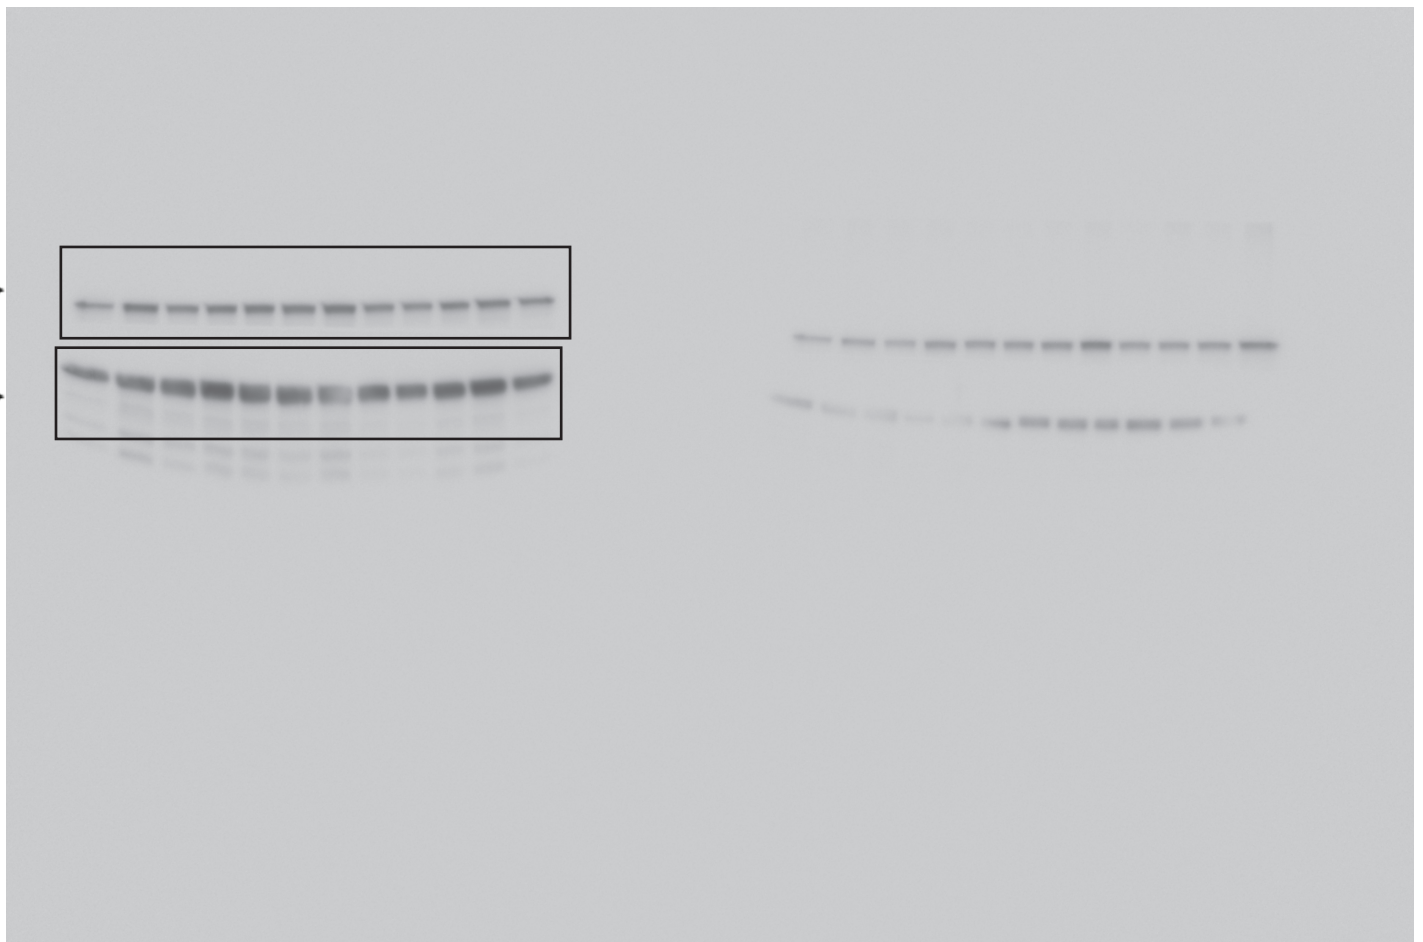

Female p-AKT, p-S6

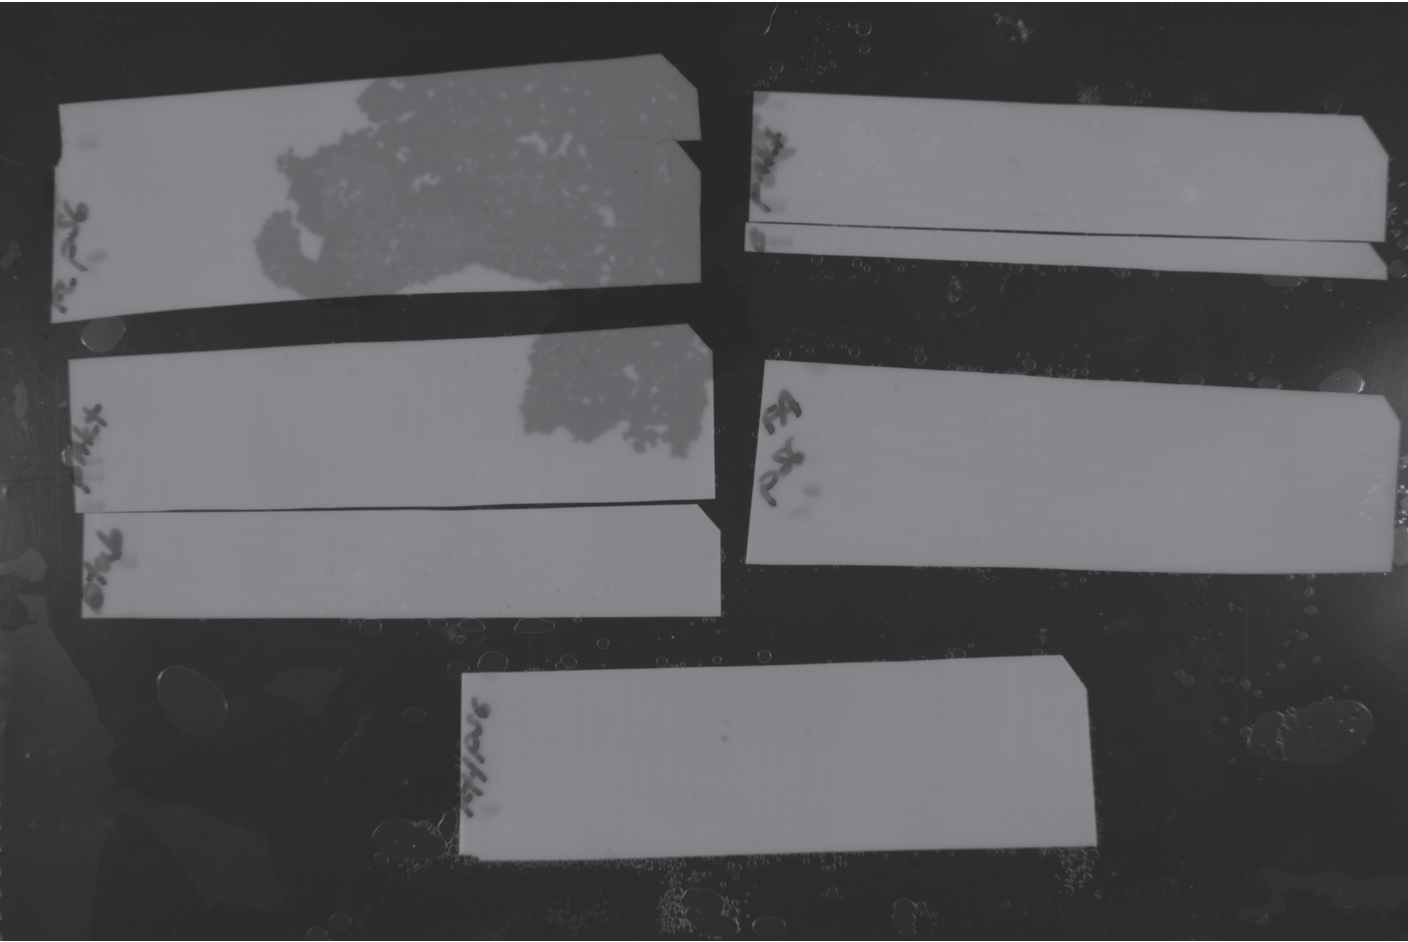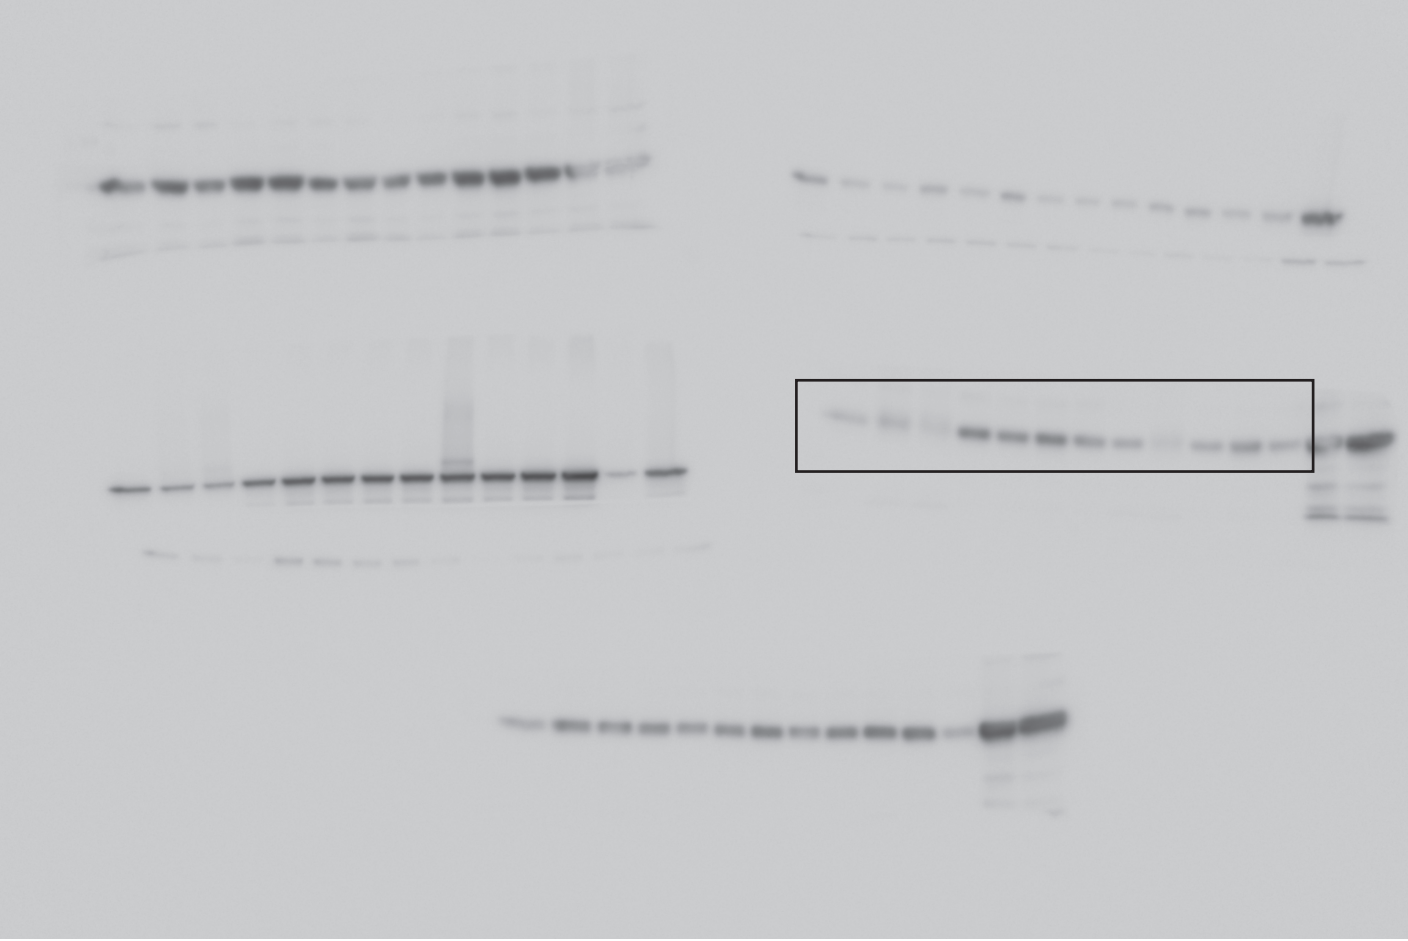



Female p-AKT, p-ULK1

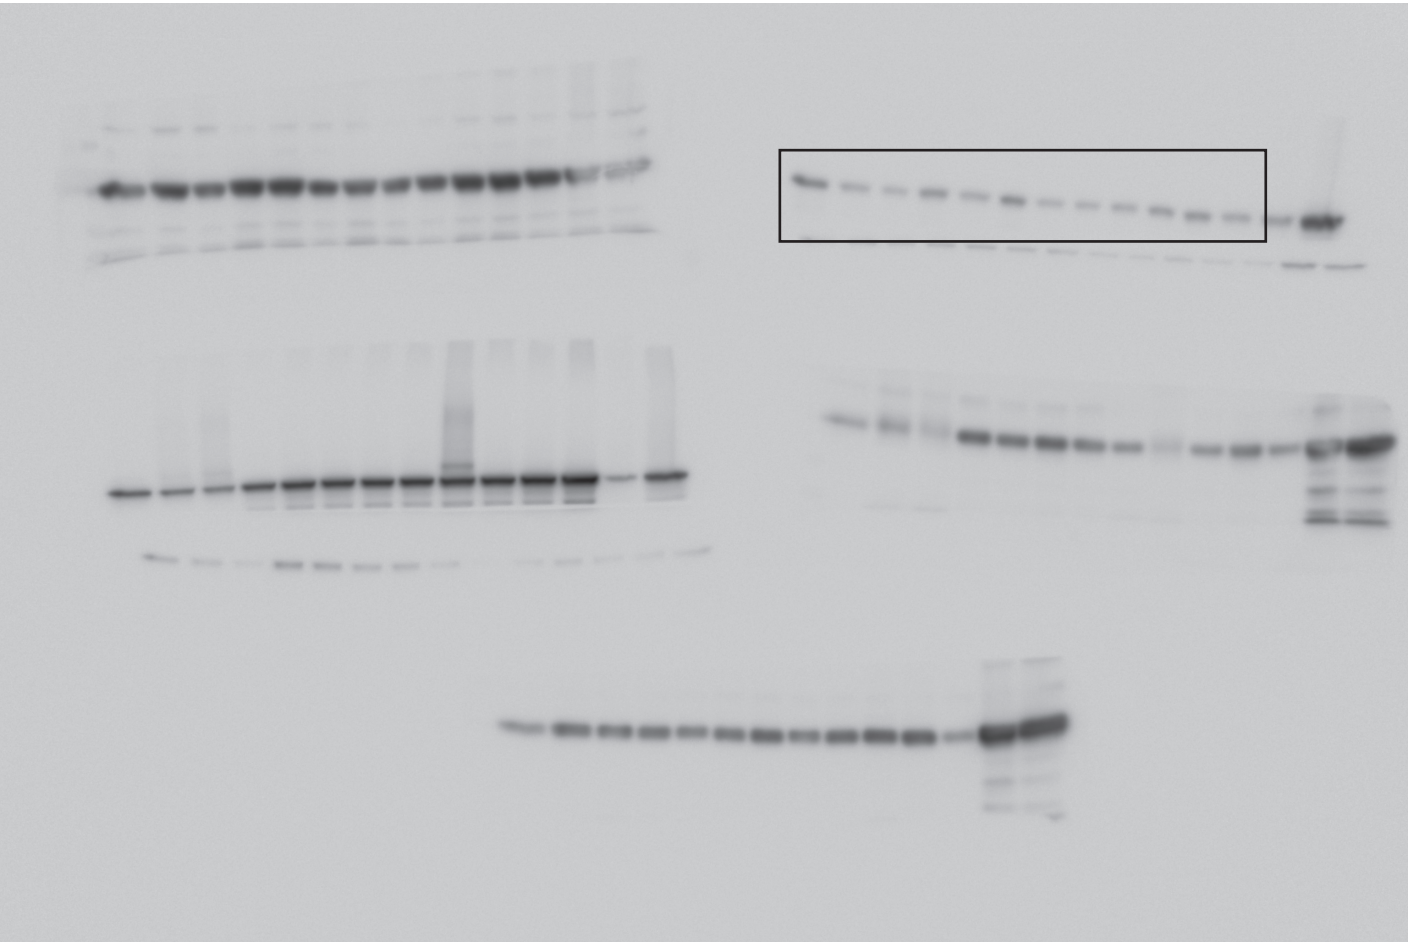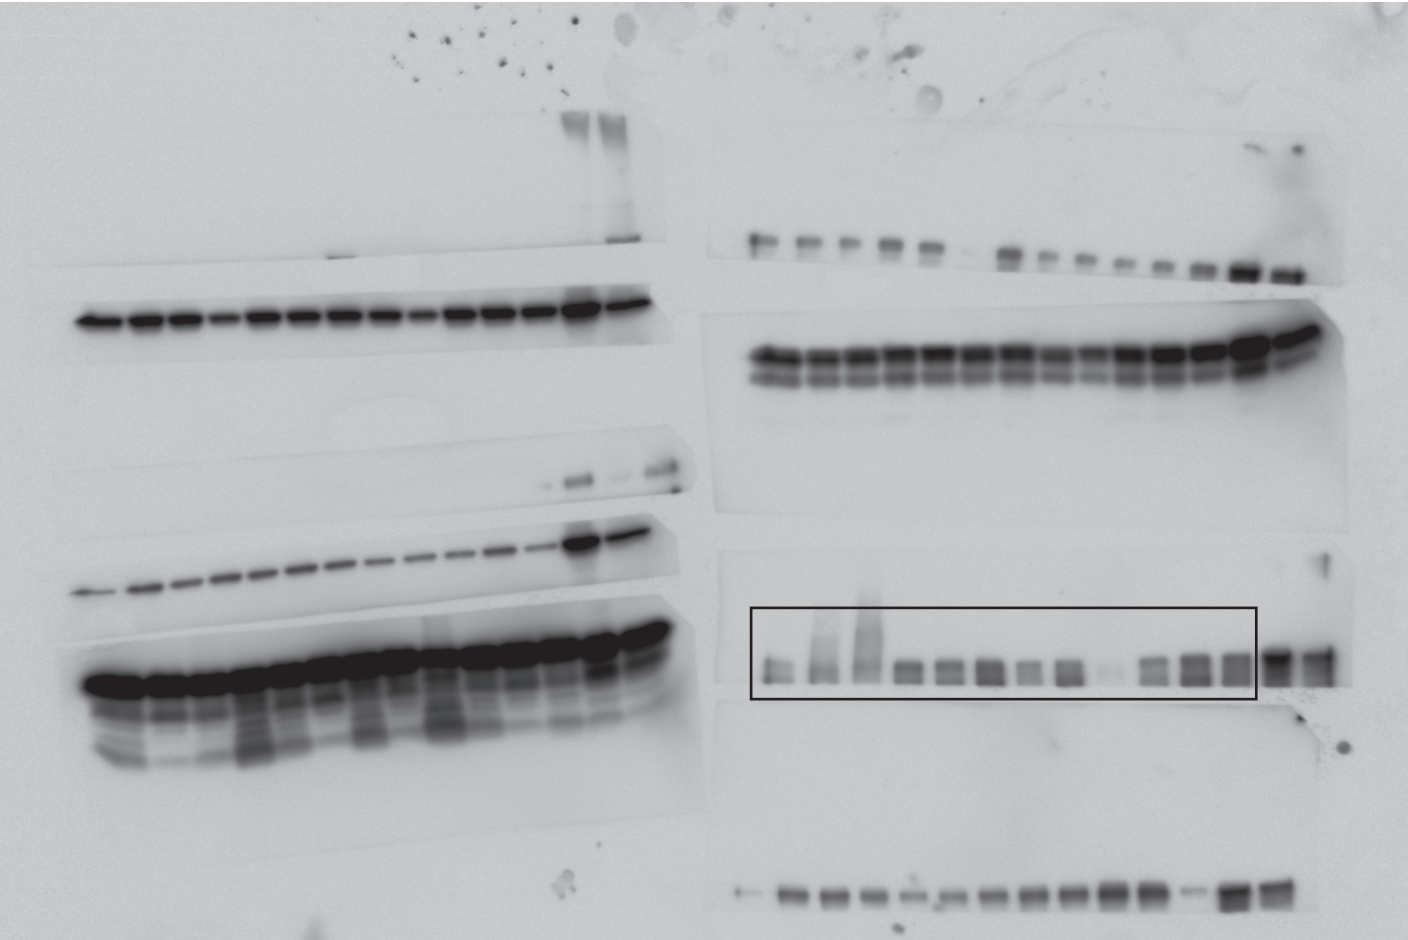

Female HSP90

HSP90  
→

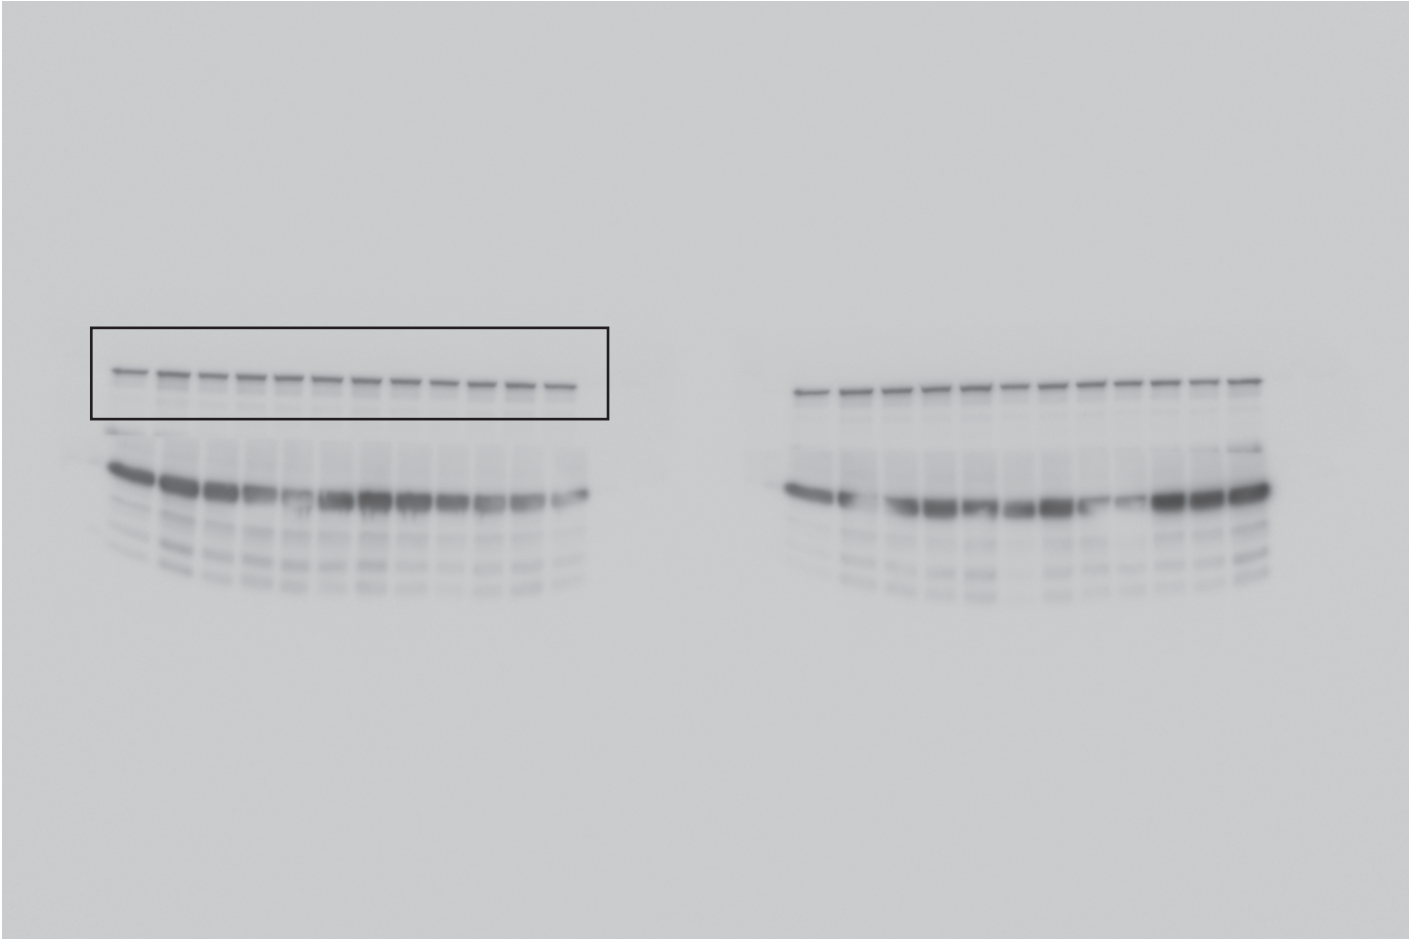

Female S6K1

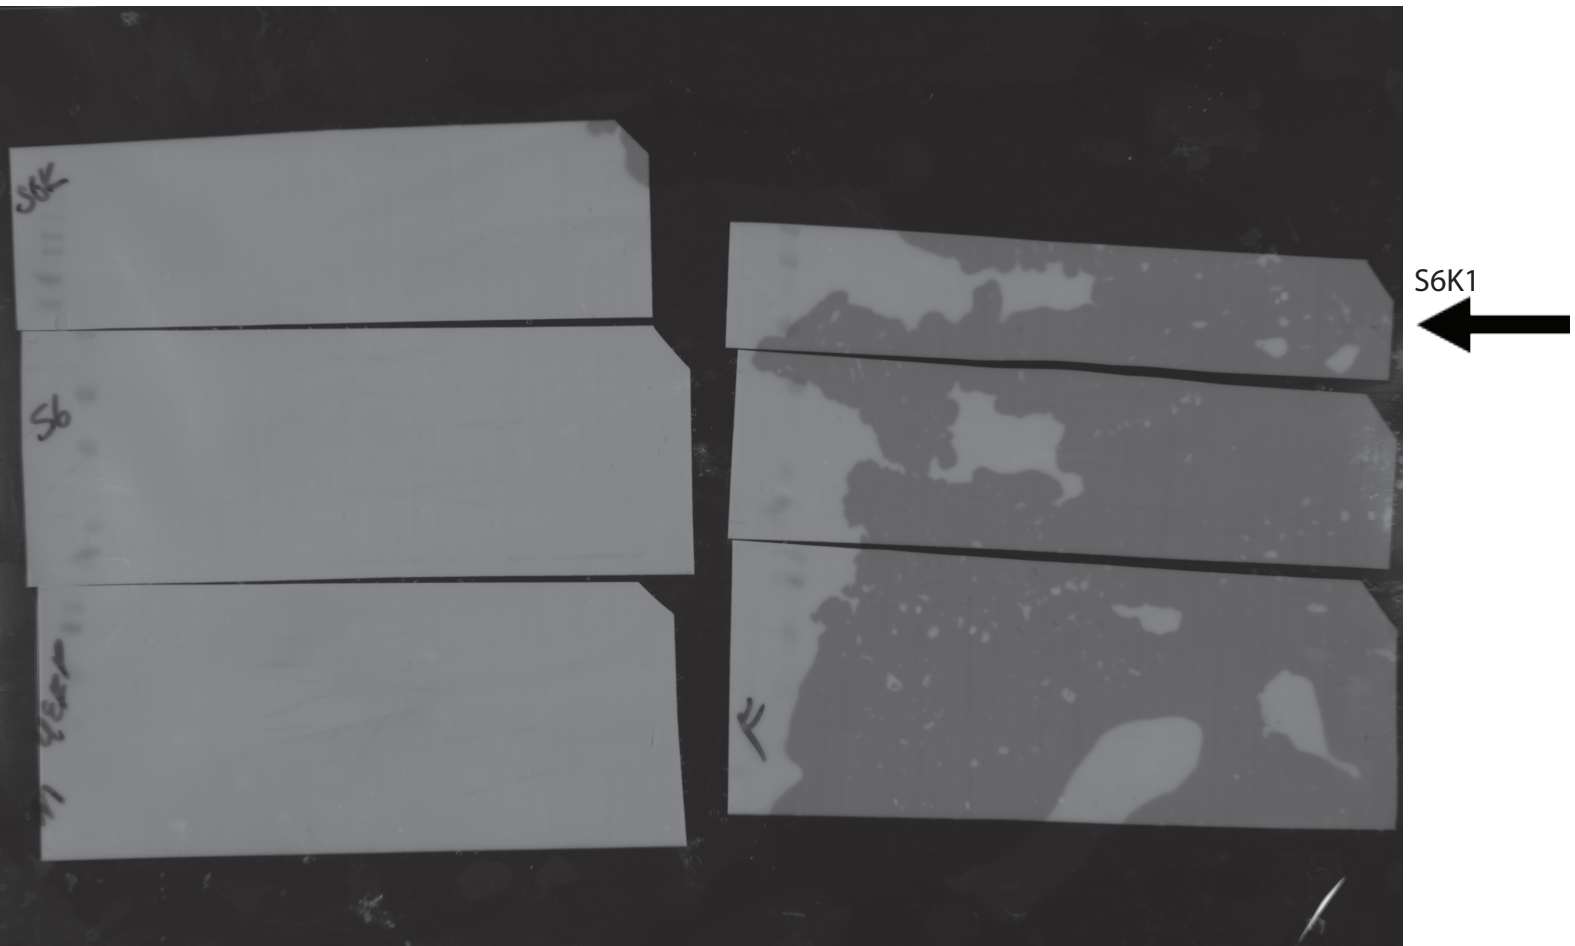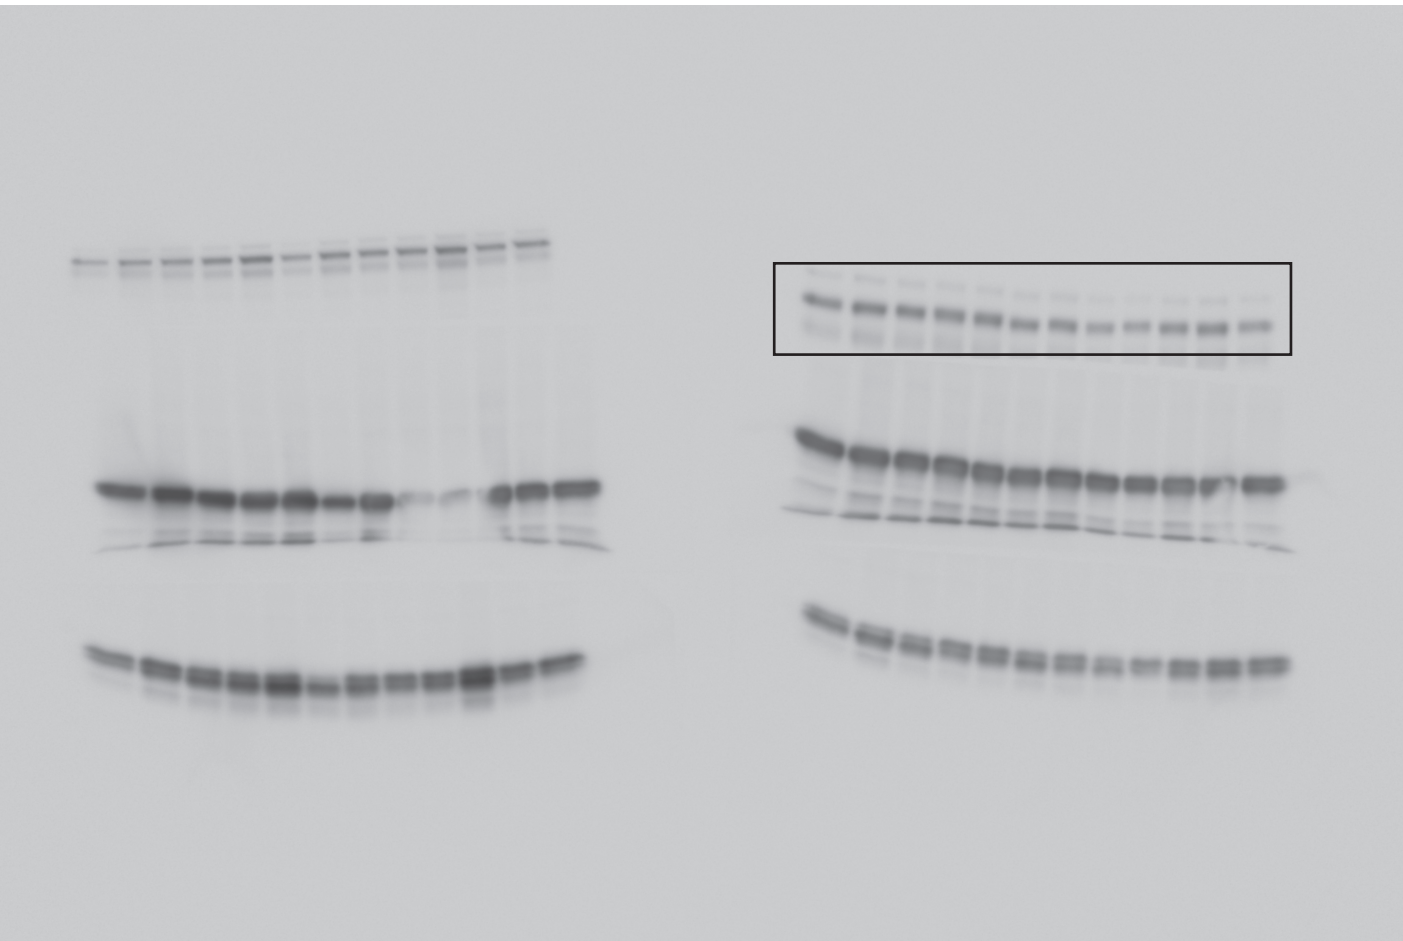

Female ULK1, p-S6K1

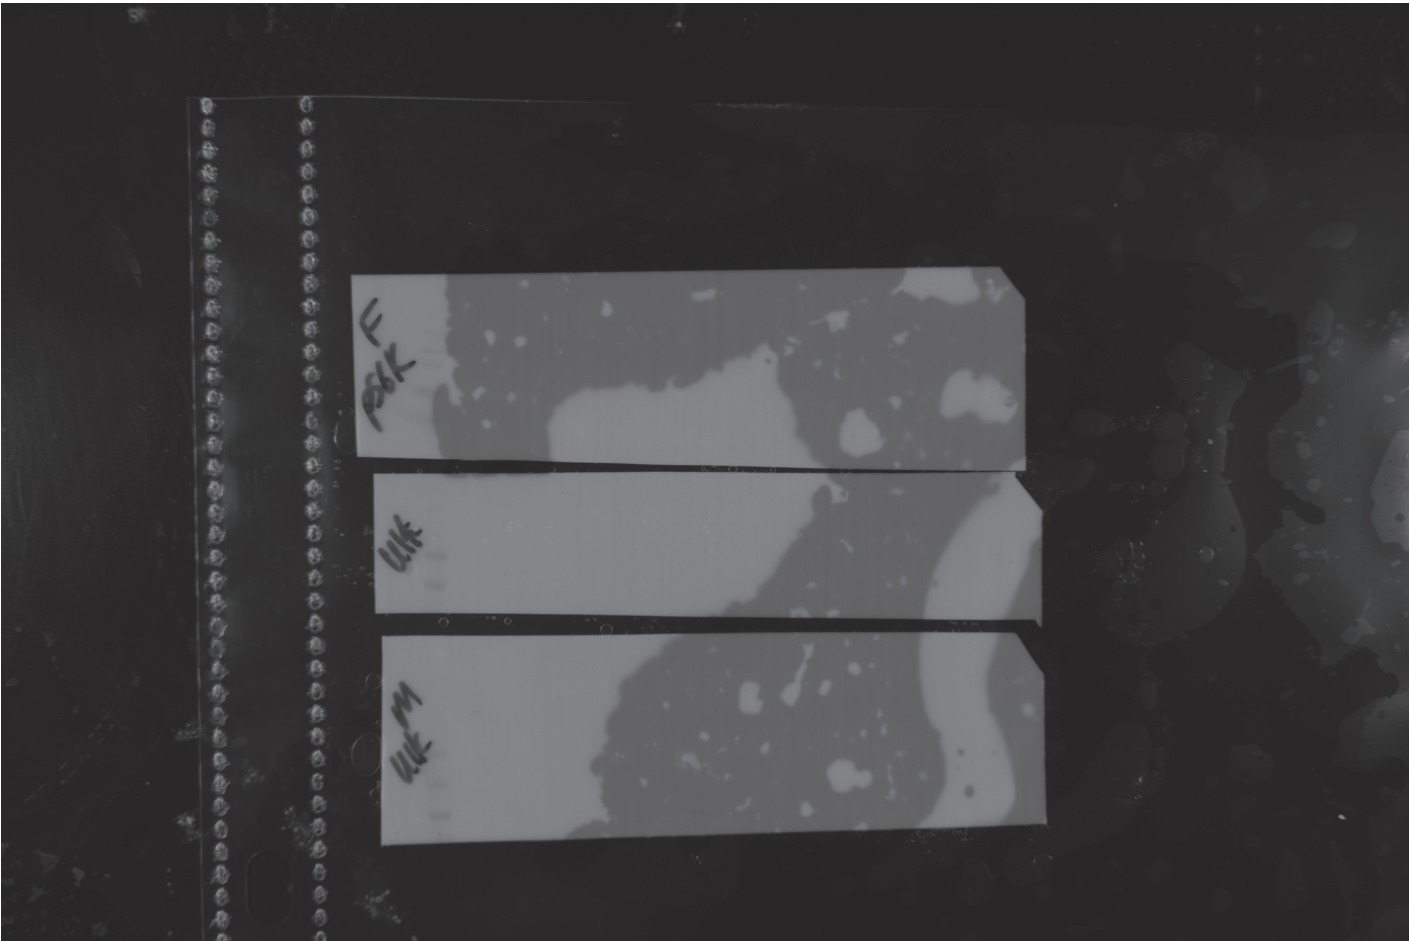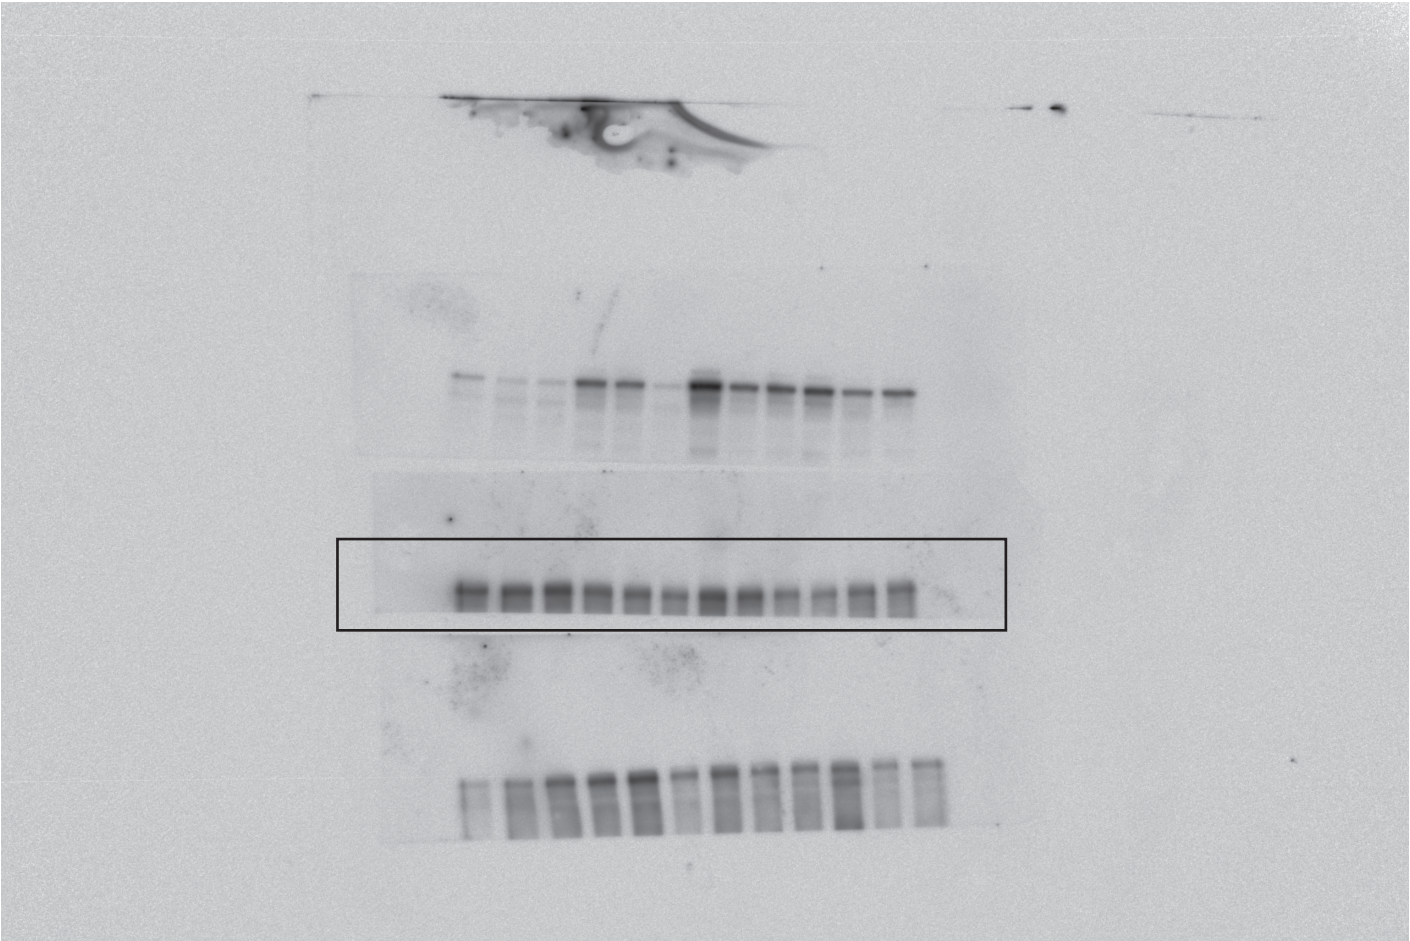

Female ULK1, p-S6K1

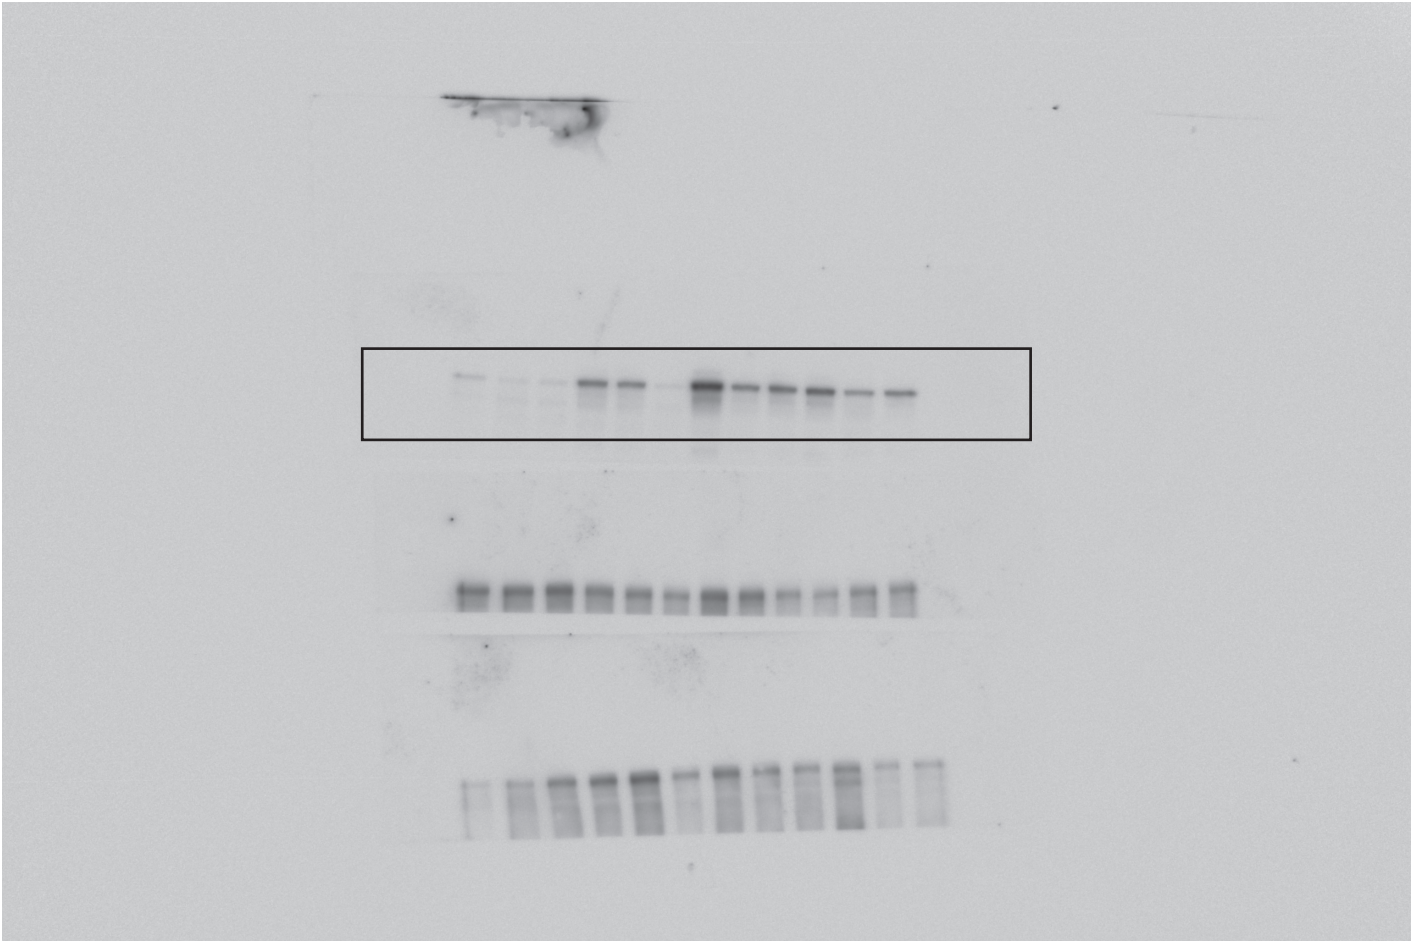

ULK1  
←
